# Supplementary material for: Synthesis of phenols from hydroxymethylfurfural (HMF)
Source: Royal Society of Chemistry journal article supplement (doi:10.1039/c6gc01622g), 2016-01-01
Supplement: c6gc01622g1.pdf [file c6gc01622g1.pdf]

## Synthesis of Phenols from Hydroxymethylfurfural (HMF)

Svetlana Tšupova<sup>a</sup>, Frank Rominger<sup>a†</sup>, Matthias Rudolph<sup>a</sup>, A. Stephen K. Hashmi<sup>a</sup>

### Supporting information

#### Experimental

Chemicals were purchased from commercial suppliers and used without further purification. HMF was purchased from Carbolution and used as received. NMR spectra were recorded at room temperature on the following spectrometers: BrukerAvance DRX-300, Bruker Avance III-300, Bruker Avance DRX-500, Bruker Avance III-500 and Bruker Avance III-600. Chemical shifts are given in ppm and coupling constants in Hz. <sup>1</sup>H and <sup>13</sup>C spectra were calibrated in relation to the deuterated solvents. The following abbreviations were used for <sup>1</sup>H NMR to indicate the signal multiplicity: s (singlet), d (doublet), t (triplet), q (quartet), quint (quintet), m (multiplet), dd (doublet of doublet), dt (doublet of triplet), bs (broad singlet). All <sup>13</sup>C NMR spectra were measured with <sup>1</sup>H decoupling. The multiplicities mentioned in the spectra [s (singlet, quaternary Carbon), d (doublet, CH group), t (triplet, CH<sub>2</sub>-group), q (quartet, CH<sub>3</sub>-group)] were determined by DEPT135 and HSQC. EI+ and FAB+ spectra were obtained using a JEOL JMD-700 spectrometer. For EI-MS electrons with energy of 70 eV were used. For the FAB-MS-matrix, 3-nitrobenzyl alcohol (NBA) or o-nitrophenyl octyl ether (NPOE) was used. For ESI+ and DART spectra, a Bruker ApexQe. FT-ICR-MSspectrometer was used. Infrared Spectroscopy (IR) was processed on a Bruker Lumos; Germanium ATR-Kristall spectrometer. The solvent or matrix is denoted in brackets. For the most significant bands, the wave number (cm<sup>-1</sup>) is given. Melting points were measured in open glass capillaries in a Büchi melting point apparatus and were not corrected. Flow reactions were performed using LATEK P-402 10 ml pump and steel column 4.6 X 250 mm, which was filled with Amberlyst ® 15 hydrogen form polymer beads, supplied by Sigma Aldrich. HPLC oven was used to heat the column. Flash column chromatography was accomplished using Silica gel 60 (0.04.0.063 mm/ 230-400 mesh ASTM purchased from MachereyNagel). Analytical Thin Layer Chromatography (TLC) was carried out on precoated aluminum sheets (Macherey-Nagel, ALUGRAM®Xtra SIL G/UV254). Components were detected under UV light 254 and were visualized by various dye solvents.

## Screening tables

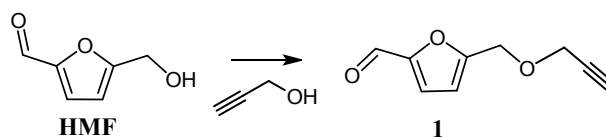

| Entry | Alcohol  | Catalyst (mol %)                                         | Temp.  | Solvent           | Result                  |
|-------|----------|----------------------------------------------------------|--------|-------------------|-------------------------|
| 1     | 3 eqs.   | <i>p</i> -TsOH (5)                                       | 60 °C  | THF               | nr                      |
| 2     | 3 eqs.   | <i>p</i> -TsOH (5)                                       | 60 °C  | DMF               | - <sup>c</sup>          |
| 3     | 3 eqs.   | <i>p</i> -TsOH (5)                                       | 60 °C  | Dioxane           | - <sup>c</sup>          |
| 4     | 3 eqs.   | <i>p</i> -TsOH (5)                                       | 60 °C  | EA                | 33% <sup>c,d</sup>      |
| 5     | -        | <i>p</i> -TsOH (5)                                       | 60 °C  | Propargyl alcohol | Full conv. <sup>f</sup> |
| 6     | 2.5 eqs. | <i>p</i> -TsOH (5)                                       | 60 °C  | Toluene           | 36% <sup>c,d</sup>      |
| 7     | 2.5 eqs. | <i>p</i> -TsOH (5)                                       | 60 °C  | DCE               | 42% <sup>c,d</sup>      |
| 8     | 2.5 eqs. | <i>p</i> -TsOH (5)                                       | 60 °C  | ACN               | 30% <sup>c,d</sup>      |
| 9     | 1 eq.    | Ph <sub>3</sub> PAuNTf <sub>2</sub> (5) <sup>a</sup>     | 60 °C  | Toluene           | - <sup>b</sup>          |
| 10    | 3 eqs.   | Ph <sub>3</sub> PAuNTf <sub>2</sub> (5) <sup>a</sup>     | 60 °C  | Toluene           | - <sup>b</sup>          |
| 11    | 5 eqs.   | Ph <sub>3</sub> PAuNTf <sub>2</sub> (5) <sup>a</sup>     | 60 °C  | Toluene           | - <sup>b</sup>          |
| 12    | 2.5 eqs. | [P(OPh) <sub>3</sub> ] <sub>4</sub> Pd (5)               | 80 °C  | Toluene           | Polymerisation          |
| 13    | 3 eqs.   | FeCl <sub>3</sub> (5)                                    | rt     | ACN               | Full conv.              |
| 14    | 3 eqs.   | FeCl <sub>3</sub> (5)                                    | rt     | THF               | nr                      |
| 15    | 10 eqs.  | FeCl <sub>3</sub> (5)                                    | rt     | ACN               | Full conv. <sup>f</sup> |
| 16    | 3 eqs.   | Fe(OTf) <sub>3</sub> (5)                                 | rt     | ACN               | 30% <sup>e</sup>        |
| 17    | 3 eqs.   | Al(OTf) <sub>3</sub> (5)                                 | rt     | ACN               | nr                      |
| 18    | 3 eqs.   | InBr <sub>3</sub> (5)                                    | rt     | ACN               | nr                      |
| 19    | 3 eqs.   | BiBr <sub>3</sub> (5)                                    | rt     | ACN               | nr                      |
| 20    | 3 eqs.   | C <sub>6</sub> F <sub>3</sub> B(OH) <sub>2</sub> (5)     | rt     | ACN               | nr                      |
| 21    | 3 eqs.   | La(NO <sub>3</sub> ) <sub>3</sub> ·6H <sub>2</sub> O (5) | rt     | ACN               | nr                      |
| 22    | -        | Amberlyst (100) 15,                                      | rt     | Propargyl alcohol | 54% <sup>d</sup>        |
| 23    | -        | Amberlyst (100) 15,                                      | 45 °C  | Propargyl alcohol | 69% <sup>d</sup>        |
| 24    | -        | Amberlyst (100) 15,                                      | 75 °C  | Propargyl alcohol | 80% <sup>d</sup>        |
| 25    | -        | Amberlyst (100) 15,                                      | 100 °C | Propargyl alcohol | 3% <sup>d</sup>         |

Table 1. Formation of propargyl-HMF under batch conditions: 0.1 mmol of HMF in 0.5 ml of solvent. Nr – no reaction. a. activated in-situ. b. no conversion of HMF, all alcohol consumed. c. dimerization of HMF. d. NMR yield using 1,3,5-trimethoxybenzene as internal standard. e. isolated yields. f. isolated yields in upscale to 0.5-1 g of HMF: 28-52%

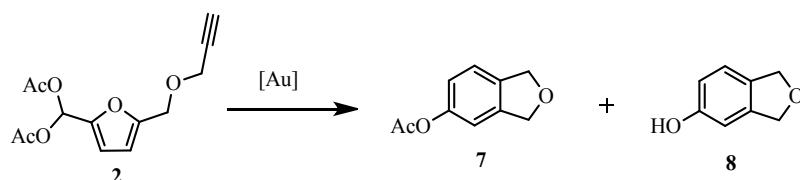

| Catalyst                               | Conversion of <b>2</b> | Deprotection | Yield of <b>7</b> | Yield of <b>8</b> |
|----------------------------------------|------------------------|--------------|-------------------|-------------------|
| IPrAuNTf <sub>2</sub>                  | 69 %                   | --           | 19 %              | 16 %              |
| Ph <sub>3</sub> PAuNTf <sub>2</sub>    | 38 %                   |              | 36 %              | 0 %               |
| TEDIIAuNTf <sub>2</sub>                | 76 %                   | --           | 29 %              | 23 %              |
| BrettPhosAuNTf <sub>2</sub>            | 100 %                  | --           | 46 %              | 34 %              |
| NACAuNTf <sub>2</sub>                  | 59 %                   |              | 0 %               | 0 %               |
| NaAuCl <sub>4</sub> ·2H <sub>2</sub> O | 7 %                    |              | 0 %               | 0 %               |
| AuCl <sub>3</sub>                      | 100 %                  | --           | 0 %               | 0 %               |
| IPr*AuNTf <sub>2</sub>                 | 61 %                   |              | 0 %               | 0 %               |
| <i>t</i> -BuNCAuNTf <sub>2</sub>       | 1 %                    |              | 0 %               | 0 %               |
| <i>t</i> -BuXPhosAuNTf <sub>2</sub>    | 100 %                  | --           | 45 %              | 32 %              |

Table 2. Catalyst screening for the cyclization of **2**. 0.1 mmol of **2** in 0.5 ml of CDCl<sub>3</sub>, 1 mol% of catalyst, room temperature. Mesitylene was used as internal standard, NMR yields are reported.

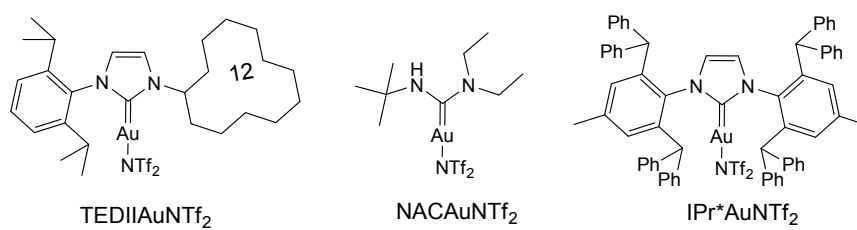

| Solvent              | Conversion of <b>2</b> | Yield of <b>7</b> | Yield of <b>8</b> |
|----------------------|------------------------|-------------------|-------------------|
| Ethyl acetate        | 100 %                  | --                | --                |
| EtOH                 | 100 % <sup>a</sup>     | --                | --                |
| <i>i</i> -PrOH       | 100 %                  | --                | --                |
| Ac <sub>2</sub> O    | 100 %                  | --                | --                |
| Acetone              | 100 %                  | --                | --                |
| THF                  | 100 %                  | --                | --                |
| MTBE                 | 100 %                  | --                | --                |
| Diethyl ether        | 100 %                  | --                | --                |
| Anisole              | 100 %                  | --                | --                |
| Sulfolane            | 100 %                  | --                | 23 % <sup>b</sup> |
| DCM <sup>c</sup>     | 100 %                  | 37 %              | 43 %              |
| BMIM PF <sub>6</sub> | 100 %                  | --                | --                |
| neat                 | 100 %                  | --                | --                |

Table 3. Solvent screening for the cyclization of **2**. 0.1 mmol of **2** in 0.5 ml of solvent, 1% of BrettPhosAuNTf<sub>2</sub>, room temperature. Mesitylene was used as internal standard, NMR yields are reported. a. triple bond hydration. b. in mixture with sulfolane. c. starting from 4 mmol of **2** and using IPrAuNTf<sub>2</sub> as a catalyst, isolated yields.

### 5-((prop-2-yn-1-yloxy)methyl)furan-2-carbaldehyde (**1**)

Representative procedure for the formation of **1** using *p*-TsOH as a catalyst.

HMF (604 mg, 4.8 mmol) was dissolved in propargyl alcohol (5 ml) and *p*-TsOH (46 mg, 0.23 mmol) was added. The obtained mixture was stirred at 70°C overnight. Volatiles were removed under reduced pressure and the residue was purified by column chromatography on silica gel (eluent petroleum ether/ethyl acetate 5:1) resulting in 340 mg of yellowish oil (43% yield).

Representative procedure for the formation of **1** under flow conditions.

Stainless steel HPLC column was packed with dry Amberlyst 15 (2.3 g), connected to pump, washed with ethyl acetate and heated to 70°C. HMF (200 mg, 1.6 mmol) was dissolved in propargyl alcohol (1 ml, 17 mmol) and ethyl acetate (1 ml) was added. The resulting mixture was introduced into the column at the flow rate 1.5 ml/min and ethyl acetate was used to pump it through the column at the same 1.5 ml/min rate. The composition of the affluent was monitored by TLC (petroleum ether/ethyl acetate 5:1). After 15-20 minutes, only faint spots of HMF and propargyl-HMF were seen and the pumping was continued for additional 5 minutes. Volatiles were removed from the obtained solution resulting in yellowish oil. If necessary, purification might be achieved by filtration through silica gel using diethyl ether as eluent yielding to 228 mg (78% of the title compound and 15% of EMF) as yellowish oil.

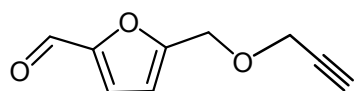

Yellowish oil.  $R_f$  (petroleum ether/ethyl acetate 3:2) = 0.62. FTIR (neat)  $\text{cm}^{-1}$ : 3283, 3122, 2905, 2856, 2117, 1770, 1693, 1585, 1522, 1444, 1402, 1351, 1276, 1193, 1016, 970, 943, 910, 809, 784.  $^1\text{H}$  NMR (300 MHz,  $\text{CDCl}_3$ )  $\delta$  = 9.56 (s, 1H), 7.15 (d,  $J$  = 3.5 Hz, 1H), 6.50 (d,  $J$  = 3.5 Hz, 1H), 4.58 (s, 2H), 4.16 (d,  $J$  = 2.4 Hz, 2H), 2.44 (t,  $J$  = 2.3 Hz, 1H).  $^{13}\text{C}$  NMR (75 MHz,  $\text{CDCl}_3$ )  $\delta$  = 177.74 (s), 157.31 (s), 152.73 (s), 121.66 (d), 111.77 (d), 78.60 (d), 75.48 (s), 63.27 (t), 57.72 (t). HRMS (EI+)  $[M^+]$  calcd: 164.0473; found: 164.0461

### (5-((prop-2-yn-1-yloxy)methyl)furan-2-yl)methylene diacetate (**2**)

5-((prop-2-yn-1-yloxy)methyl)furan-2-carbaldehyde **1** (2.51 g, 15.3 mmol) was dissolved in acetic anhydride (2.8 ml, 30 mmol) and  $\text{La}(\text{NO}_3)_3 \cdot 6\text{H}_2\text{O}$  (132 mg, 0.31 mmol) was added. The obtained mixture was stirred overnight. Then 50 ml of diethyl ether were added and the obtained mixture was filtered through celite. Volatiles were removed yielding 4.2 g of brownish oil (quantitative yield, contains minor amount of acetic acid).

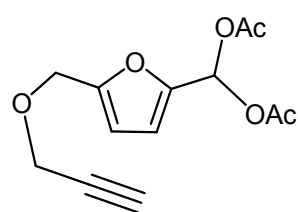

Brownish oil.  $R_f$  (petroleum ether/ethyl acetate 3:2) = 0.61. FTIR (neat)  $\text{cm}^{-1}$ : 1935, 1764, 1682, 1563, 1524, 1441, 1373, 1239, 1203, 1080, 1018, 969, 810.  $^1\text{H}$  NMR (300 MHz,  $\text{CDCl}_3$ )  $\delta$  = 7.67 (s, 1H), 6.48 (d,  $J$  = 3.2 Hz, 1H), 6.36 (d,  $J$  = 3.2 Hz, 1H), 4.56 (s, 2H), 4.18 (d,  $J$  = 2.2 Hz, 2H), 2.47 (t,  $J$  = 1.9 Hz, 1H), 2.13 (s, 6H).  $^{13}\text{C}$  NMR (75 MHz,  $\text{CDCl}_3$ )  $\delta$  = 168.38 (s), 152.19 (s), 148.21 (s), 110.55 (d), 110.46 (d), 83.39 (d), 79.05 (s), 75.01 (t), 63.08 (t), 57.09 (t), 20.70 (q). HRMS (EI+)  $[M^+]$  calcd: 266.0790; found: 266.0816

### 1,3-dihydroisobenzofuran-5-yl acetate (**8**)

(5-((prop-2-yn-1-yloxy)methyl)furan-2-yl)methylene diacetate **2** (1.00 g, 3.76 mmol) was dissolved in DCM (25 ml) and *t*-BuXPhosAuNTf<sub>2</sub> (17 mg, 0.02 mmol) was added. The resulting mixture as stirred at room temperature overnight. Volatiles were removed and the residue was purified by column chromatography on silica gel (eluent petroleum ether/ethyl acetate 5:1). 267 mg of colorless oil (**8**, 40% yield) and 190 mg of white solid (**9**, 37% yield) were isolated. Analytical data for **9** matches literature data.<sup>i</sup>

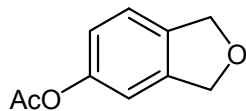

Colorless oil.  $R_f$  (petroleum ether/ethyl acetate 5:1) = 0.44. FTIR (neat)  $\text{cm}^{-1}$ : 3496, 3288, 3060, 3029, 3856, 2674, 2386, 2084, 1940, 1750, 1682, 1654, 1622, 1597, 1485, 1434, 1365, 1317, 1287, 1180, 1136, 1099, 1012, 949.  $^1\text{H}$  NMR (400 MHz,  $\text{CDCl}_3$ )  $\delta$  = 7.22 (d,  $J$  = 8.8 Hz, 2H), 7.00 – 6.94 (m, 3H), 5.09 (s, 4H), 2.30 (s, 3H).  $^{13}\text{C}$  NMR (101 MHz,  $\text{CDCl}_3$ )  $\delta$  = 169.63 (s), 150.21 (s), 140.78 (s), 136.60 (s), 121.68 (d), 120.66 (d), 114.54 (d), 73.36 (t), 73.23 (t), 21.06 (q). HRMS (EI+)  $[M^+]$  calcd: 178.0630; found: 178.0615

### 5,5'-((5-((prop-2-yn-1-yloxy)methyl)furan-2-yl)methylene)bis(2-methylfuran) (3)

5-((prop-2-yn-1-yloxy)methyl)furan-2-carbaldehyde **1** (100 mg, 0.61 mmol) was dissolved in acetonitrile and methylfuran (153  $\mu\text{l}$ , 1.44 mmol) and  $\text{AuCl}_3$  (0.12 ml, 0.05 M solution, 0.006 mmol) were added. The resulting mixture was stirred for 3 days. Volatiles were removed and the residue was purified by chromatography on silica gel (eluent petroleum ether/ethyl acetate 10:1) resulting in 25 mg (12% yield) of 5,5'-((5-((5-methylfuran-2-yl)methyl)furan-2-yl)methylene)bis(2-methylfuran) and 126 mg (76% yield) of 5,5'-((5-((prop-2-yn-1-yloxy)methyl)furan-2-yl)methylene)bis(2-methylfuran).

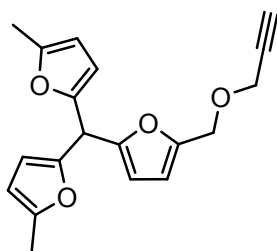

Brownish oil.  $R_f$  (petroleum ether/ethyl acetate 10:1) = 0.34. FTIR (neat)  $\text{cm}^{-1}$ : 3131, 3105, 2980, 2948, 2922, 2885, 1676, 1614, 1561, 1450, 1383, 1359, 1271, 1217, 1020, 1000, 950, 772.  $^1\text{H}$  NMR (400 MHz,  $\text{CDCl}_3$ )  $\delta$  = 6.31 (d,  $J$  = 3.2 Hz, 1H), 6.06 (d,  $J$  = 3.1 Hz, 1H), 5.97 (d,  $J$  = 3.0 Hz, 2H), 5.89 (dd,  $J$  = 3.0, 0.9 Hz, 2H), 5.41 (s, 1H), 4.52 (s, 2H), 4.14 (d,  $J$  = 2.4 Hz, 2H), 2.43 (t,  $J$  = 2.4 Hz, 1H), 2.26 (s, 6H).  $^{13}\text{C}$  NMR (101 MHz,  $\text{CDCl}_3$ )  $\delta$  = 153.33 (s), 151.53 (s), 150.18 (s), 150.10 (s), 111.01 (d), 107.96 (d), 106.23 (d), 79.43 (s), 74.66 (s), 63.21 (t), 56.59 (t), 39.18 (d), 13.56 (q). HRMS (EI+)  $[M^+]$  calcd: 310.1205; found: 310.1217.

### 5,5'-((5-((5-methylfuran-2-yl)methyl)furan-2-yl)methylene)bis(2-methylfuran)

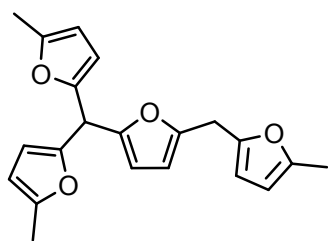

Brownish oil.  $R_f$  (petroleum ether/ethyl acetate 10:1) = 0.68. FTIR (neat)  $\text{cm}^{-1}$ : 2981, 2948, 2922, 2885, 1771, 1707, 1613, 1562, 1450, 1384, 1359, 1218, 1175, 1022, 1000, 950, 776.  $^1\text{H}$  NMR (400 MHz,  $\text{CDCl}_3$ )  $\delta$  = 6.00 (q,  $J$  = 3.4 Hz, 2H), 5.96 (d,  $J$  = 2.9 Hz, 2H), 5.93 – 5.85 (m, 4H), 5.38 (s, 1H), 3.91 (s, 2H), 2.26 (s, 9H).  $^{13}\text{C}$  NMR (101 MHz,  $\text{CDCl}_3$ )  $\delta$  = 151.41 (s), 151.37 (s), 151.20 (s), 150.91 (s), 150.55 (s), 149.71 (s), 107.87 (d), 107.84 (d), 107.76 (d), 107.03 (d), 106.19 (d), 106.10 (d), 39.15 (d), 27.57 (t), 13.57 (q), 13.47 (q). HRMS (EI+)  $[M^+]$  calcd: 336.1362; found: 336.1368.

### (5-(ethoxymethyl)furan-2-yl)methanol (5)

Ethoxymethylfurfural (889 mg, 5.77 mmol) was dissolved in methanol (10 ml) and  $\text{NaBH}_4$  (622 mg, 16.4 mmol) was added by small portions. The obtained mixture was stirred for overnight. Volatiles were removed and the residue was purified by chromatography on silica gel (eluent petroleum ether/ethyl acetate 5:1) resulting in 774 mg (86%) of colorless oil.

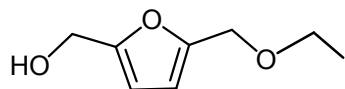

Colorless oil.  $R_f$  (petroleum ether/ethyl acetate 2:1) = 0.61. FTIR (neat)  $\text{cm}^{-1}$ : 3228, 2945, 2878, 1563, 1454, 1402, 1360, 1245, 1205, 1183, 1029, 999, 975, 923, 817.  $^1\text{H}$  NMR (301 MHz,  $\text{CDCl}_3$ )  $\delta$  = 6.28 – 6.20 (m, 2H), 4.59 (s, 2H), 4.42 (s, 2H), 3.54 (q,  $J$  = 7.0 Hz, 2H), 1.82 (s, 1H), 1.22 (t,  $J$  = 7.0 Hz, 3H).  $^{13}\text{C}$  NMR (101 MHz,  $\text{CDCl}_3$ )  $\delta$  = 154.26 (s), 152.06 (s), 109.79 (d), 108.36 (d), 65.75 (t), 64.61 (t), 57.57 (t), 15.04 (q). HRMS (EI+)  $[M^+]$  calcd: 156.0786; found: 156.0789

### 2-(ethoxymethyl)-5-((prop-2-yn-1-yloxy)methyl)furan (6)

(5-(ethoxymethyl)furan-2-yl)methanol **5** (750 mg, 4.81 mmol) was dissolved in toluene (5 ml) and  $\text{K}_2\text{CO}_3$  (1.33 g, 9.62 mmol), KOH (940 mg, 16.8 mmol) and TBAHS (153 mg, 0.48 mmol) were added. The resulting mixture was stirred at room temperature overnight. Water was added and aqueous layer was

extracted with ether. Volatiles were removed and the residue was purified by column chromatography on silica gel (eluent petroleum ether/ethyl acetate 5:1) resulting in 927 mg (99%) of colorless liquid.

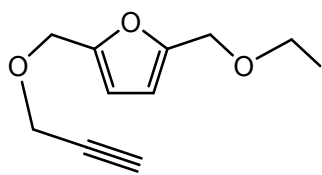

Colorless liquid.  $R_f$  (petroleum ether/ethyl acetate 5:1) = 0.48. FTIR (neat)  $\text{cm}^{-1}$ : 2976, 2929, 2858, 2115, 1714, 1609, 1557, 1484, 1442, 1372, 1348, 1254, 1219, 1197, 1169, 1070, 961, 929, 887, 843, 796.  $^1\text{H}$  NMR (301 MHz,  $\text{CDCl}_3$ )  $\delta$  = 6.32 (d,  $J$  = 3.1 Hz, 1H), 6.27 (d,  $J$  = 3.2 Hz, 1H), 4.54 (s, 2H), 4.42 (s, 2H), 4.17 (d,  $J$  = 2.4 Hz, 2H), 3.54 (d,  $J$  = 7.0 Hz, 2H), 2.46 (t,  $J$  = 2.4 Hz, 1H), 1.22 (t,  $J$  = 7.0 Hz, 3H).  $^{13}\text{C}$  NMR (101 MHz,  $\text{CDCl}_3$ )  $\delta$  = 152.74 (s), 150.92 (s), 110.71 (d), 109.64 (d), 79.30 (s), 74.76 (d), 65.73 (t), 64.61 (t), 63.22 (t), 56.79 (t), 15.05 (q). HRMS (EI+)  $[\text{M}^+]$  calcd: 194.0943; found: 194.0943

### Cycloisomerization of 2-(ethoxymethyl)-5-((prop-2-yn-1-yloxy)methyl)furan

2-(ethoxymethyl)-5-((prop-2-yn-1-yloxy)methyl)furan **6** (200 mg, 1.03 mmol) was dissolved in ethyl acetate (5 ml) and  $\text{IPrAuNTf}_2$  (6.8 mg, 0.007 mmol) was added. The resulting mixture was stirred at room temperature overnight. Volatiles were removed and the residue was purified by column chromatography on silica gel (eluent petroleum ether/ethyl acetate 10:1) resulting in 9.5 mg of 6-(ethoxymethyl)-1,3-dihydrofuro[3,4-c]oxepine (5%), 117 mg of 5-(ethoxymethyl)-1,3-dihydroisobenzofuran-4-ol **9** (59%), 20 mg of 1,3-dihydroisobenzofuran-5-ol **8** (20%) and 14 mg of the mixture of 4-(ethoxymethyl)-1,3-dihydroisobenzofuran-5-ol **10** and 6-(ethoxymethyl)-1,3-dihydroisobenzofuran-5-ol **11** (1:5 mixture, 7%).

### 6-(ethoxymethyl)-1,3-dihydrofuro[3,4-c]oxepine

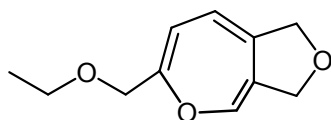

Colorless oil.  $R_f$  (petroleum ether/ethyl acetate 10:1) = 0.29. FTIR (neat)  $\text{cm}^{-1}$ : 2976, 2857, 1939, 1765, 1686, 1617, 1592, 1490, 1442, 1411, 1392, 1365, 1303, 1264, 1250, 1201, 1174, 1148, 1100, 1076, 1047, 1000, 917, 901, 846, 817.  $^1\text{H}$  NMR (400 MHz,  $\text{CDCl}_3$ )  $\delta$  = 7.13 (d,  $J$  = 8.5 Hz, 1H), 7.02 – 6.83 (m, 2H), 5.21 (s, 2H), 5.12 – 4.98 (m, 4H), 3.74 (q,  $J$  = 7.1 Hz, 2H), 1.23 (t,  $J$  = 7.1 Hz, 3H).  $^{13}\text{C}$  NMR (101 MHz,  $\text{CDCl}_3$ )  $\delta$  = 157.25 (s), 140.74 (s), 132.22 (s), 121.60 (d), 115.81 (d), 108.90 (d), 93.52 (t), 73.54 (t), 73.22 (t), 64.26 (t), 15.10 (q). HRMS (EI+)  $[\text{M}^+]$  calcd: 194.0943; found: 194.0941.

### 5-(ethoxymethyl)-1,3-dihydroisobenzofuran-4-ol (**9**)

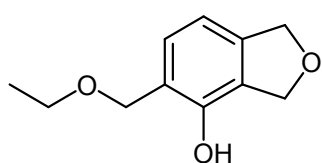

Colorless solid.  $R_f$  (petroleum ether/ethyl acetate 10:1) = 0.17. FTIR (neat)  $\text{cm}^{-1}$ : 3354, 2976, 2895, 2868, 1737, 1632, 1598, 1487, 1463, 1441, 1378, 1349, 1327, 1281, 1263, 1233, 1153, 1121, 1088, 1044, 1008, 984, 937, 897, 803, 788. mp = 52.8–54.3 °C.  $^1\text{H}$  NMR (400 MHz,  $\text{CDCl}_3$ )  $\delta$  = 7.89 (s, 1H), 6.91 (d,  $J$  = 7.5 Hz, 1H), 6.70 (d,  $J$  = 7.5 Hz, 1H), 5.13 (m, 2H), 5.08 (m, 2H), 4.74 (s, 2H), 3.62 (q,  $J$  = 7.0 Hz, 2H), 1.28 (t,  $J$  = 7.0 Hz, 3H).  $^{13}\text{C}$  NMR (101 MHz,  $\text{CDCl}_3$ )  $\delta$  = 150.86 (s), 141.33 (s), 127.56 (d), 126.46 (s), 120.82 (s), 111.97 (d), 73.84 (t), 72.17 (t), 71.73 (t), 66.30 (t), 15.02 (q). HRMS (EI+)  $[\text{M}^+]$  calcd: 194.0943; found: 194.0940

### 1:5 Mixture of 4-(ethoxymethyl)-1,3-dihydroisobenzofuran-5-ol (**10**) and 6-(ethoxymethyl)-1,3-dihydroisobenzofuran-5-ol (**11**)

Colorless oil.  $R_f$  (petroleum ether/ethyl acetate 10:1) = 0.11. FTIR (neat)  $\text{cm}^{-1}$ : 3302, 2859, 1733, 1620, 1598, 1495, 1460, 1372, 1284, 1223, 1145, 1097, 1026, 943, 889, 855, 814, 761. HRMS (EI+)  $[\text{M}^+]$  calcd: 194.0943; found: 194.0936

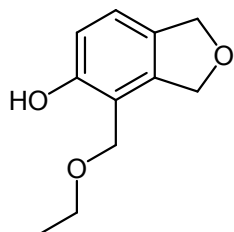

**4-(ethoxymethyl)-1,3-dihydroisobenzofuran-5-ol (**10**)**

$^1\text{H}$  NMR (400 MHz,  $\text{CDCl}_3$ )  $\delta$  = 7.77 (s, 1H), 7.02 (d,  $J$  = 8.1 Hz, 1H), 6.80 (d,  $J$  = 8.1 Hz, 1H), 5.16 (s, 2H), 4.69 (s, 2H), 4.62 (s, 2H), 3.61 (q,  $J$  = 7.1 Hz, 2H), 1.28 (t,  $J$  = 7.0 Hz, 3H).  $^{13}\text{C}$  NMR (101 MHz,  $\text{CDCl}_3$ )  $\delta$  = 155.79 (s), 141.02 (s), 130.08 (s), 121.09 (d), 116.18 (d), 115.66 (s), 73.52 (t), 72.31 (t), 69.08 (t), 66.77 (t), 15.01 (q).

**6-(ethoxymethyl)-1,3-dihydroisobenzofuran-5-ol (11)**

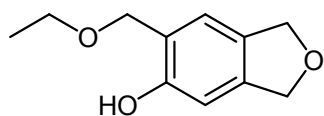

$^1\text{H}$  NMR (400 MHz,  $\text{CDCl}_3$ )  $\delta$  = 7.70 (s, 1H), 6.87 (s, 1H), 6.76 (s, 1H), 5.04 (s, 4H), 4.69 (s, 2H), 3.61 (q,  $J$  = 7.1 Hz, 2H), 1.28 (t,  $J$  = 7.0 Hz, 3H).  $^{13}\text{C}$  NMR (101 MHz,  $\text{CDCl}_3$ )  $\delta$  = 156.08 (s), 137.62 (s), 131.07 (s), 121.59 (s), 120.25 (d), 109.01 (d), 73.47 (t), 73.12 (t), 72.15 (t), 66.19 (t), 15.01 (q).

# 5-((prop-2-yn-1-yloxy)methyl)furan-2-carbaldehyde (1)

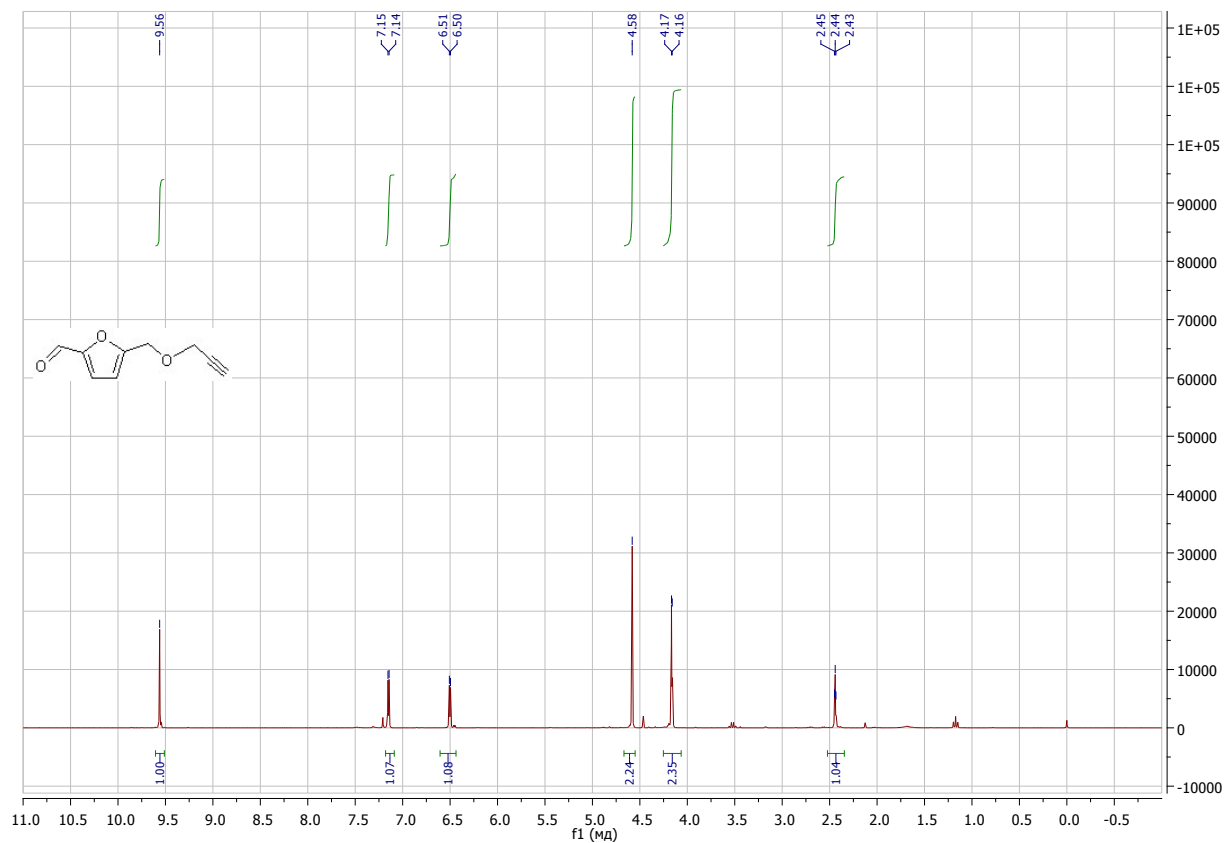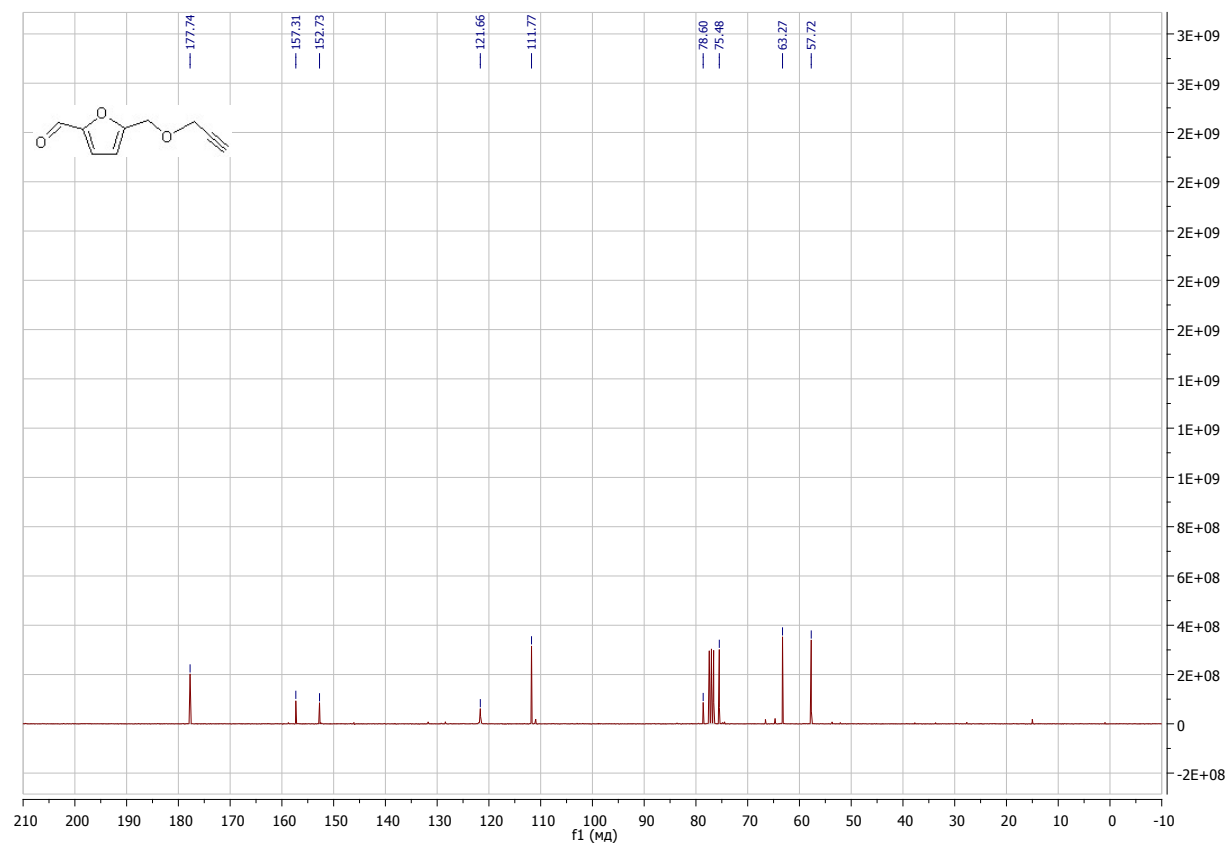



(5-((prop-2-yn-1-yloxy)methyl)furan-2-yl)methylene diacetate (2)

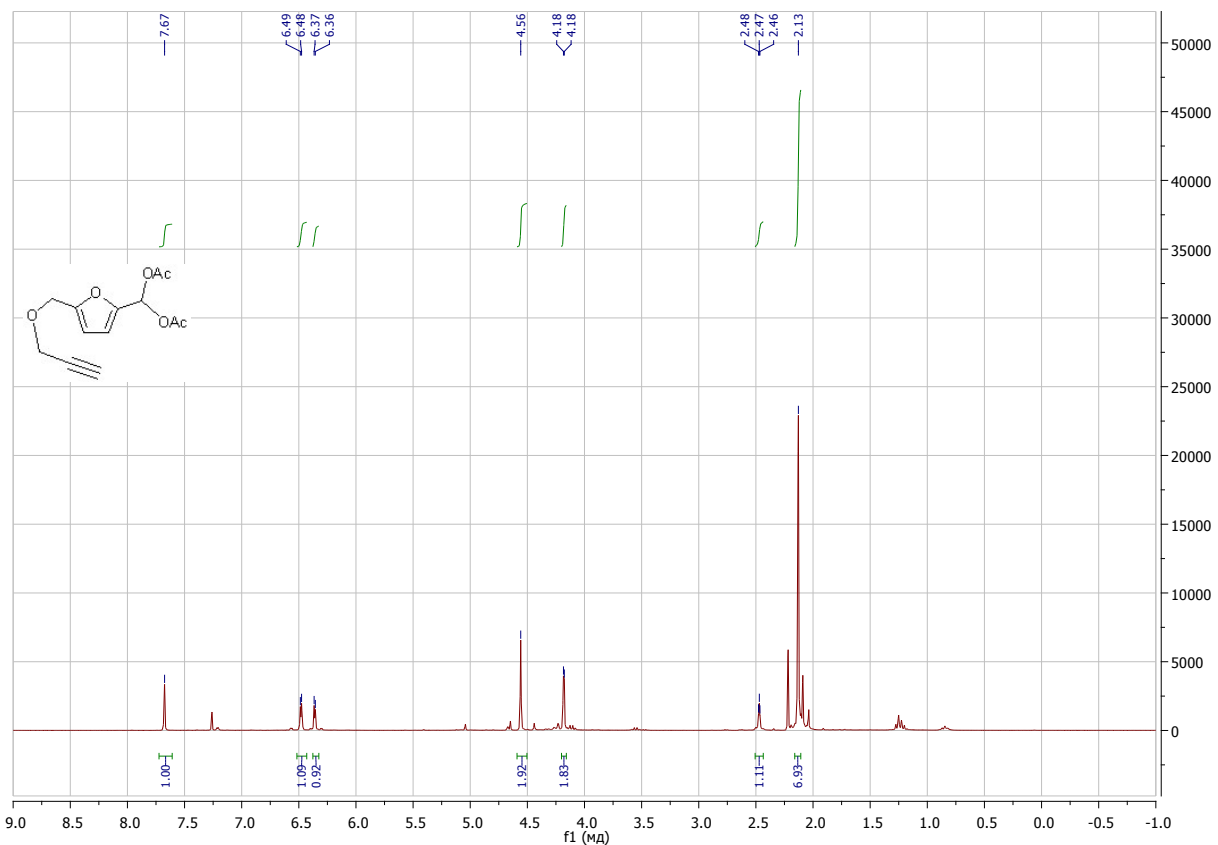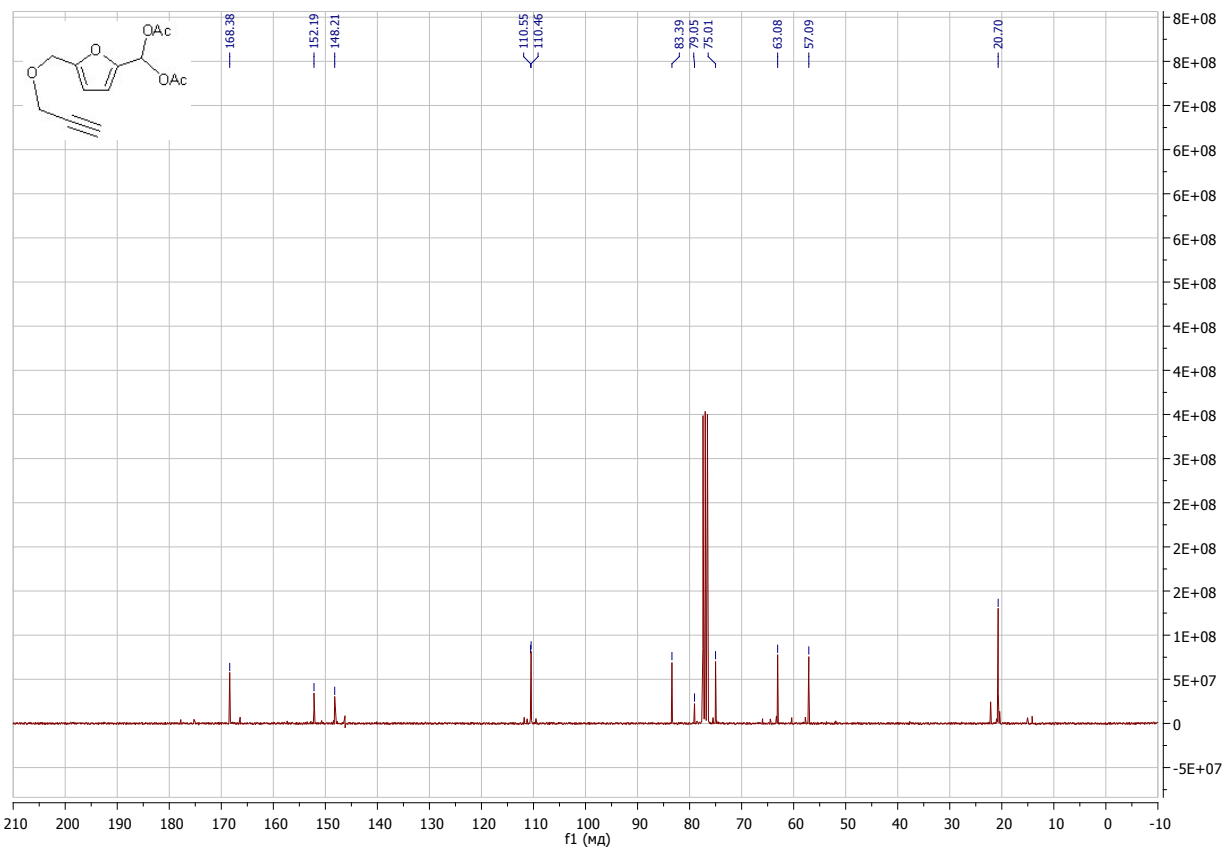

# 1,3-dihydroisobenzofuran-5-yl acetate (8)

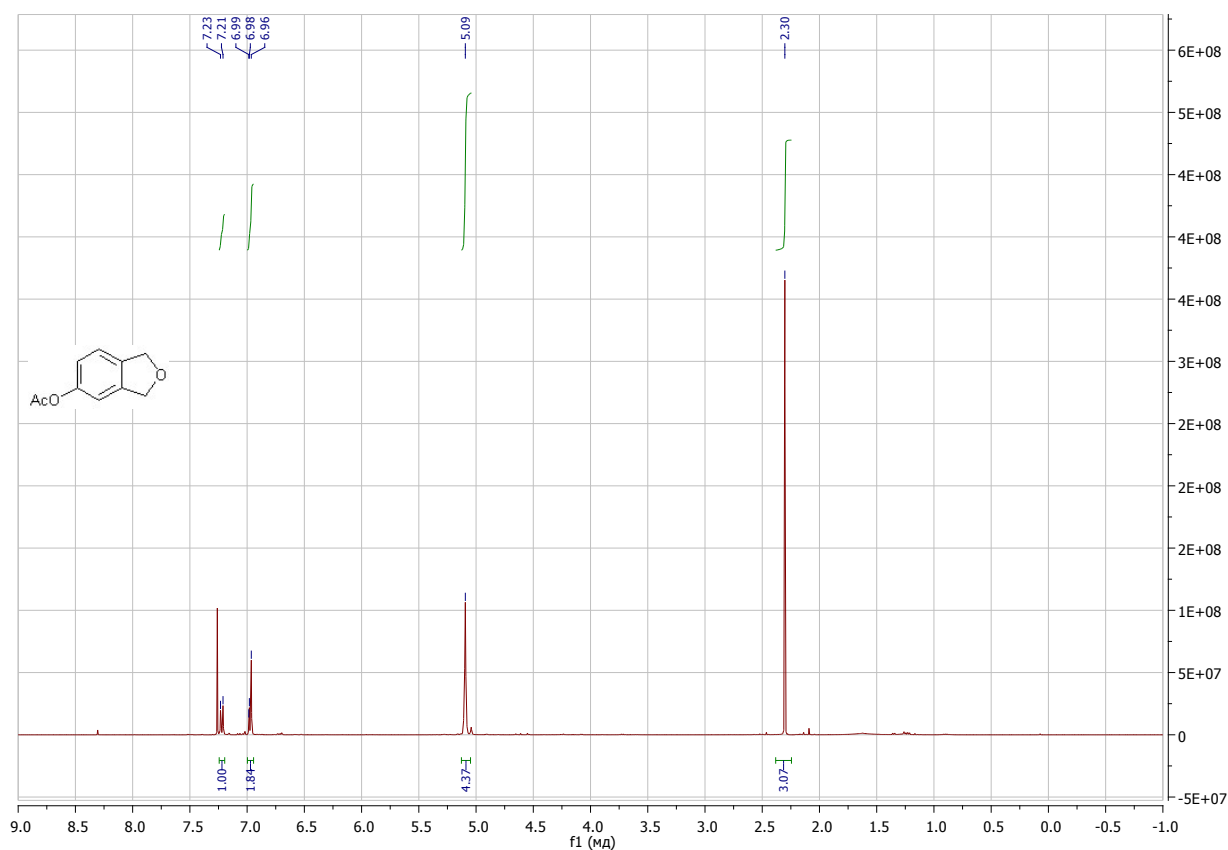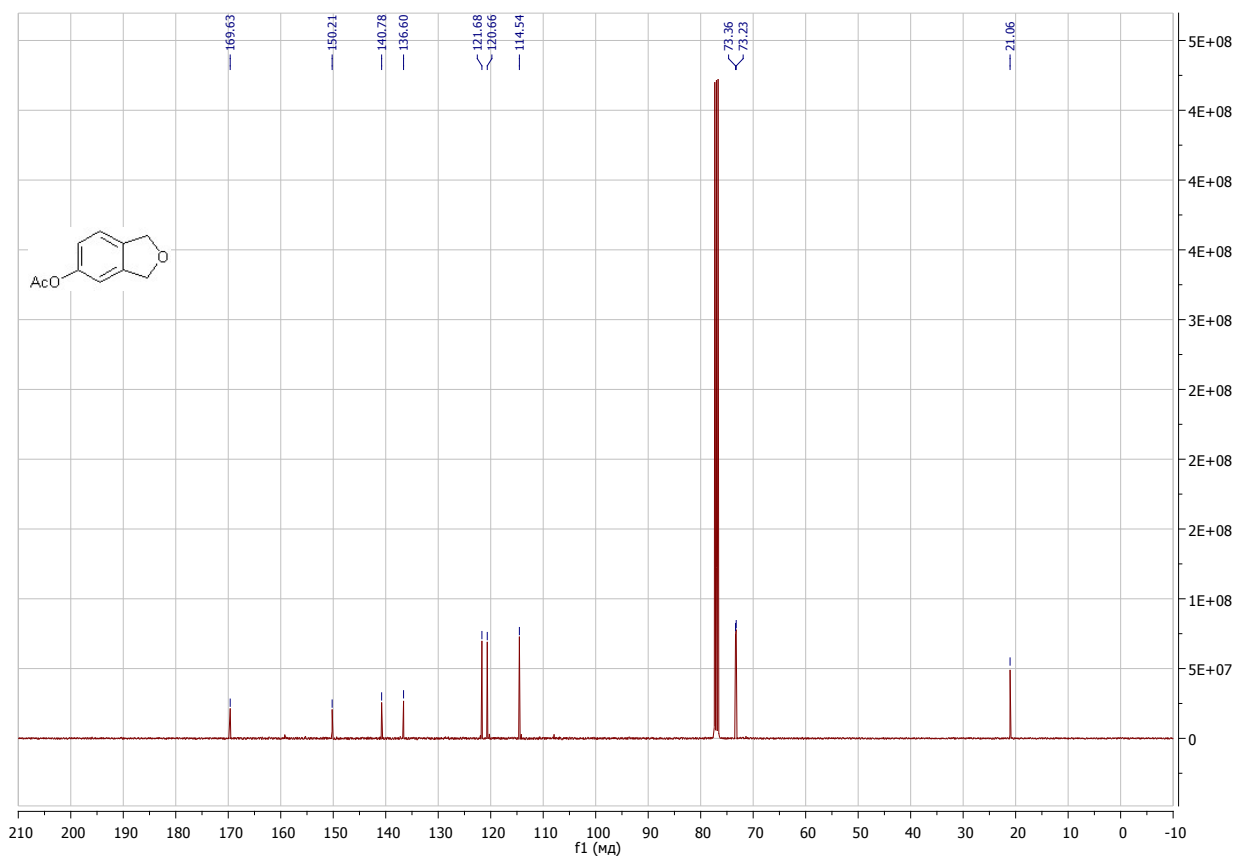

### 5,5'-((5-((prop-2-yn-1-yloxy)methyl)furan-2-yl)methylene)bis(2-methylfuran) (3)

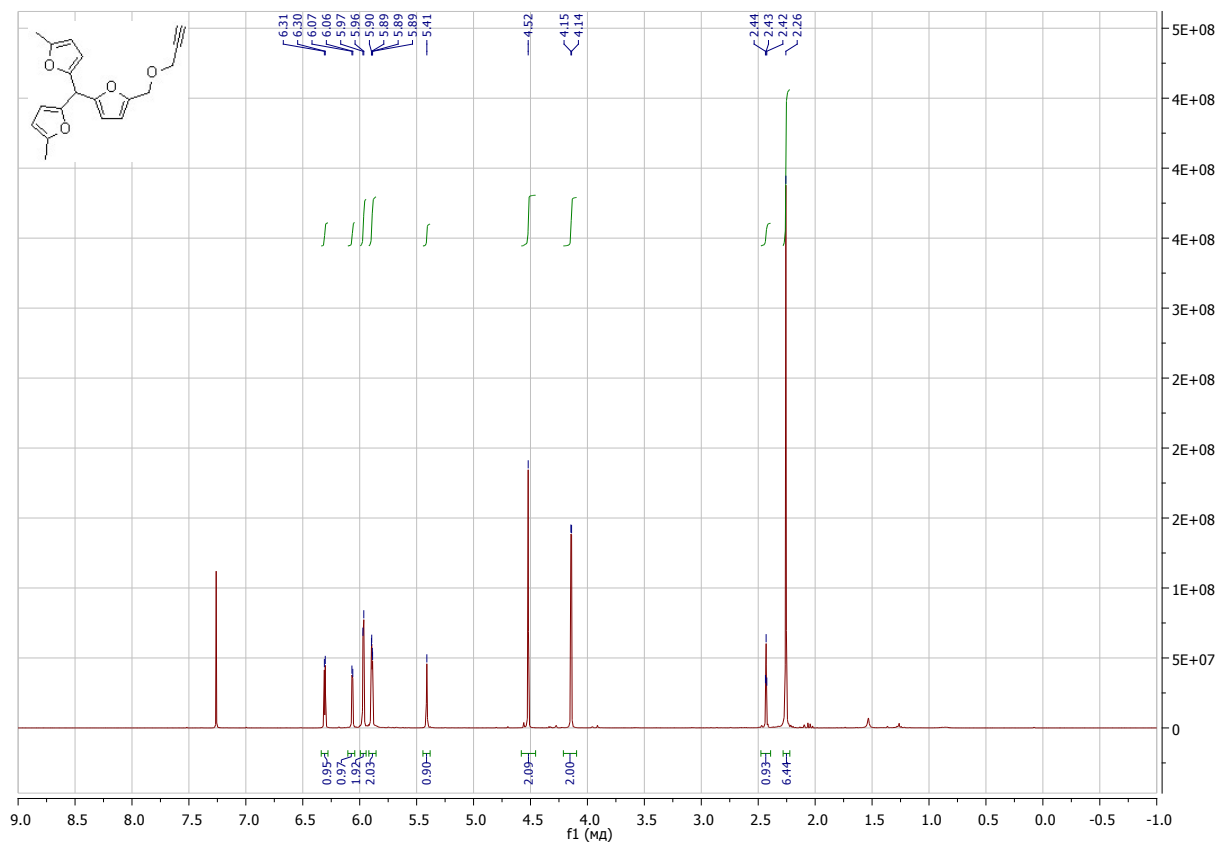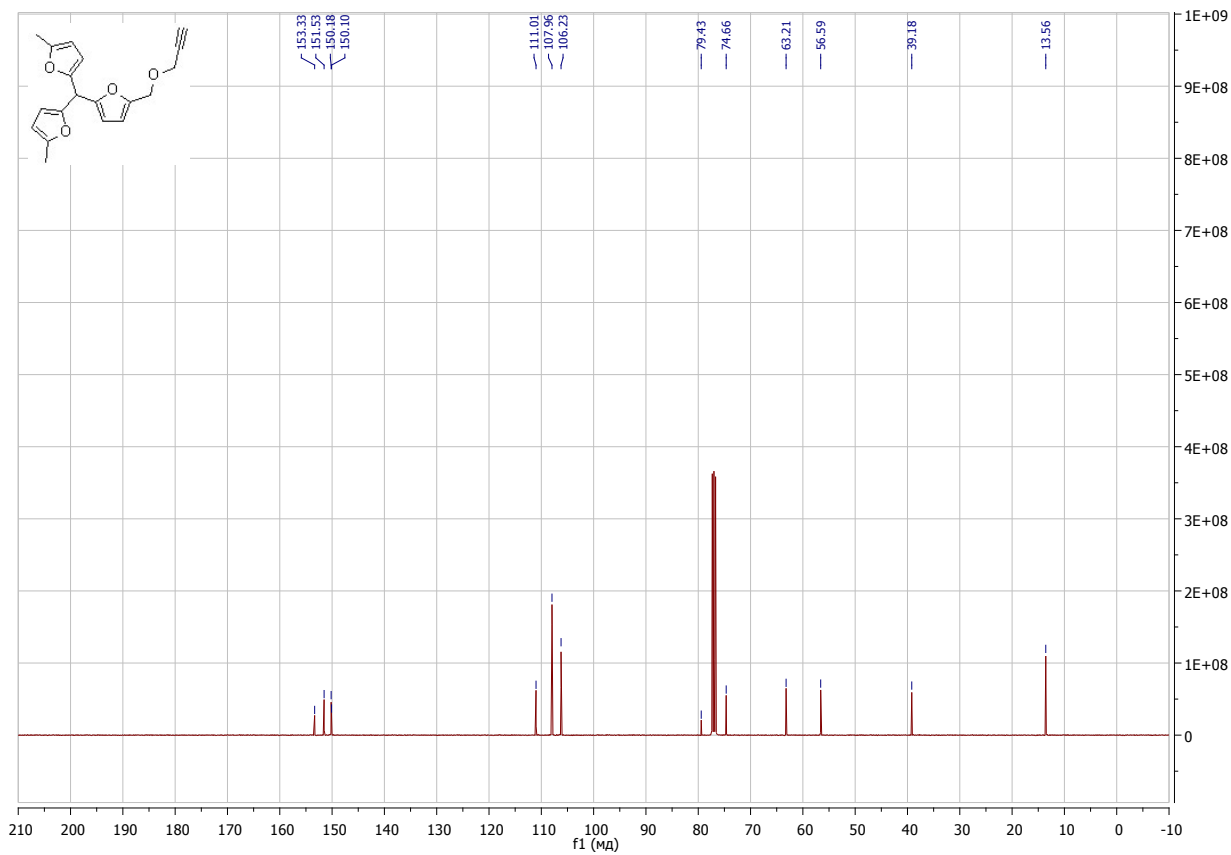

# 5,5'-((5-((5-methylfuran-2-yl)methyl)furan-2-yl)methylene)bis(2-methylfuran)

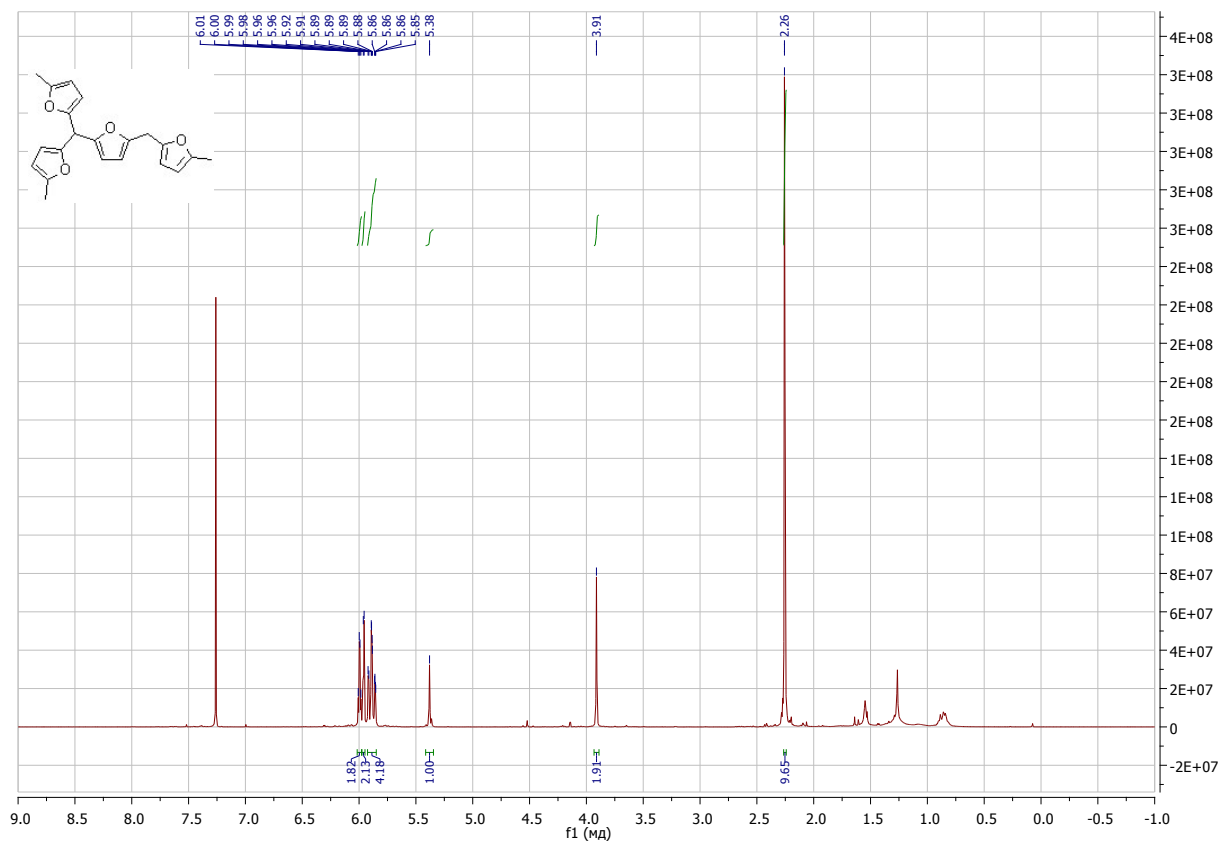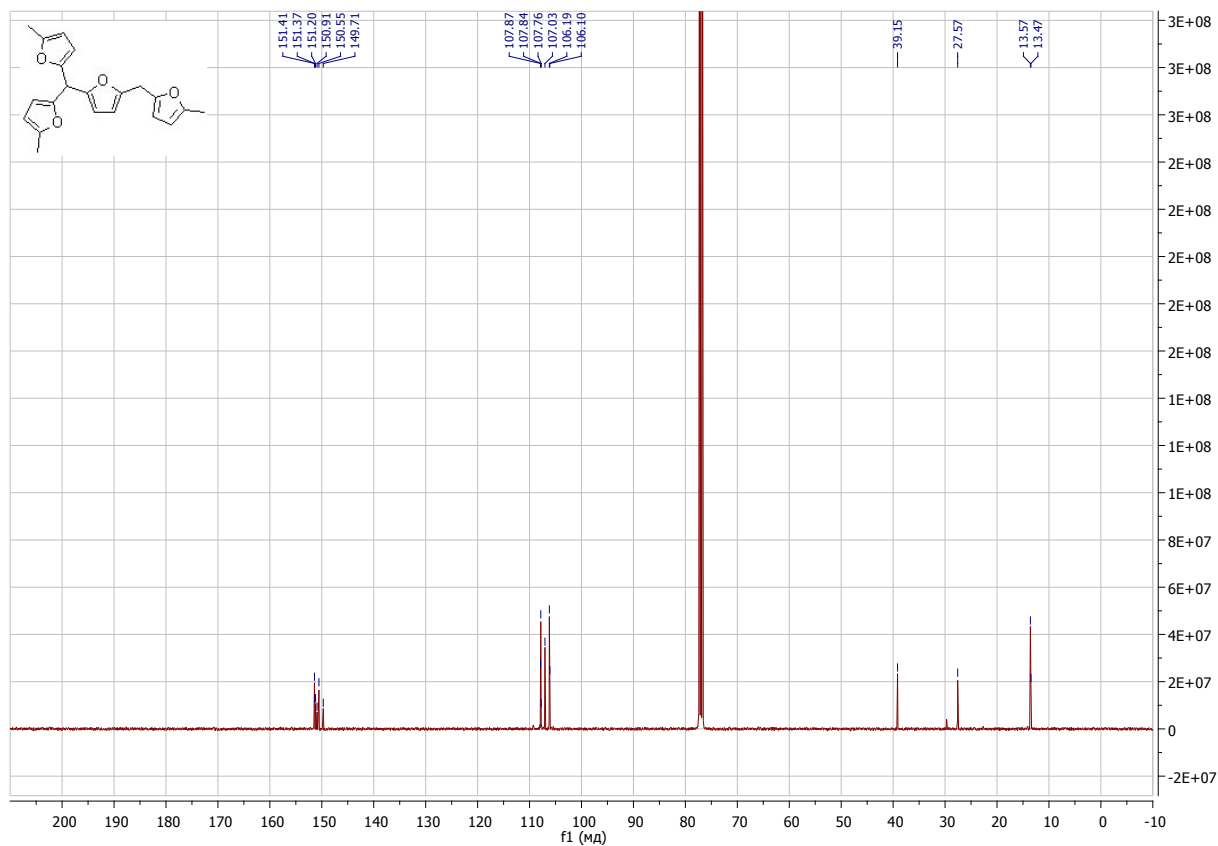

**(5-(ethoxymethyl)furan-2-yl)methanol (5)**

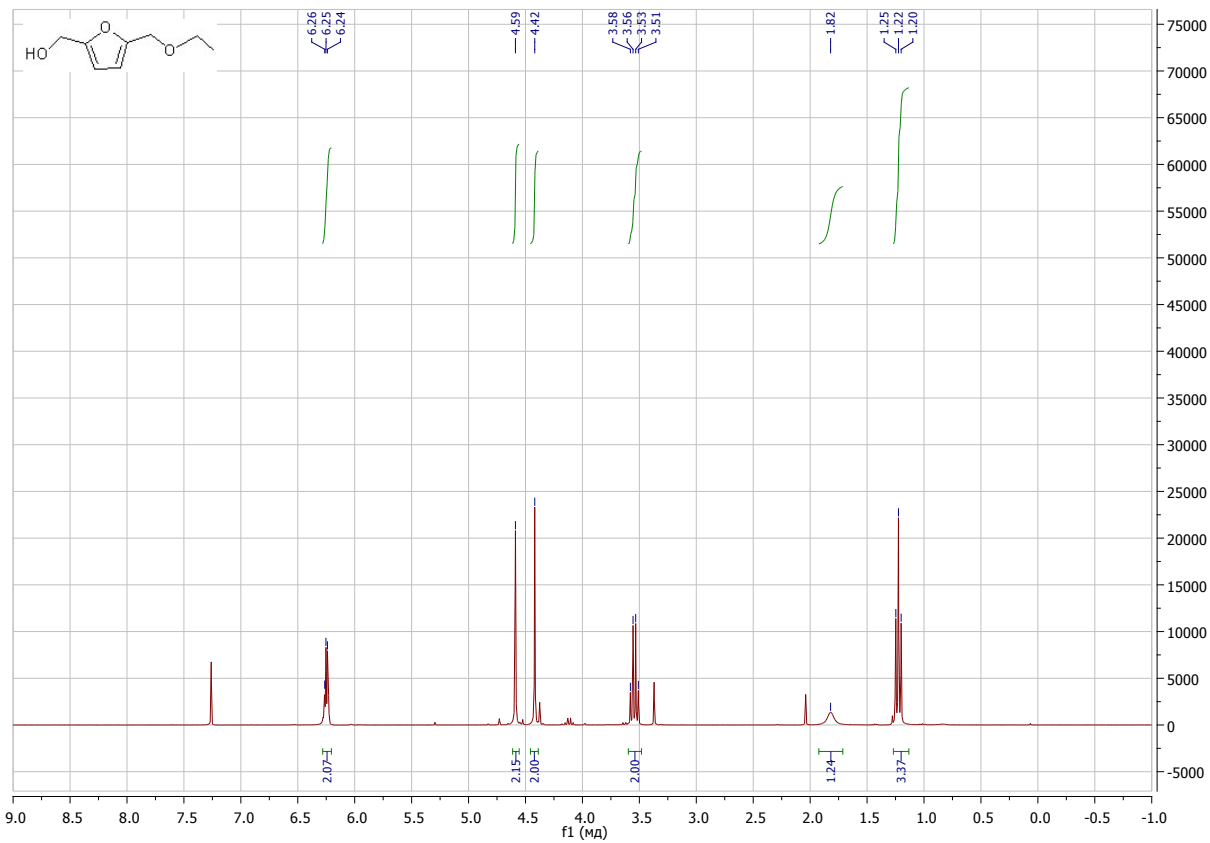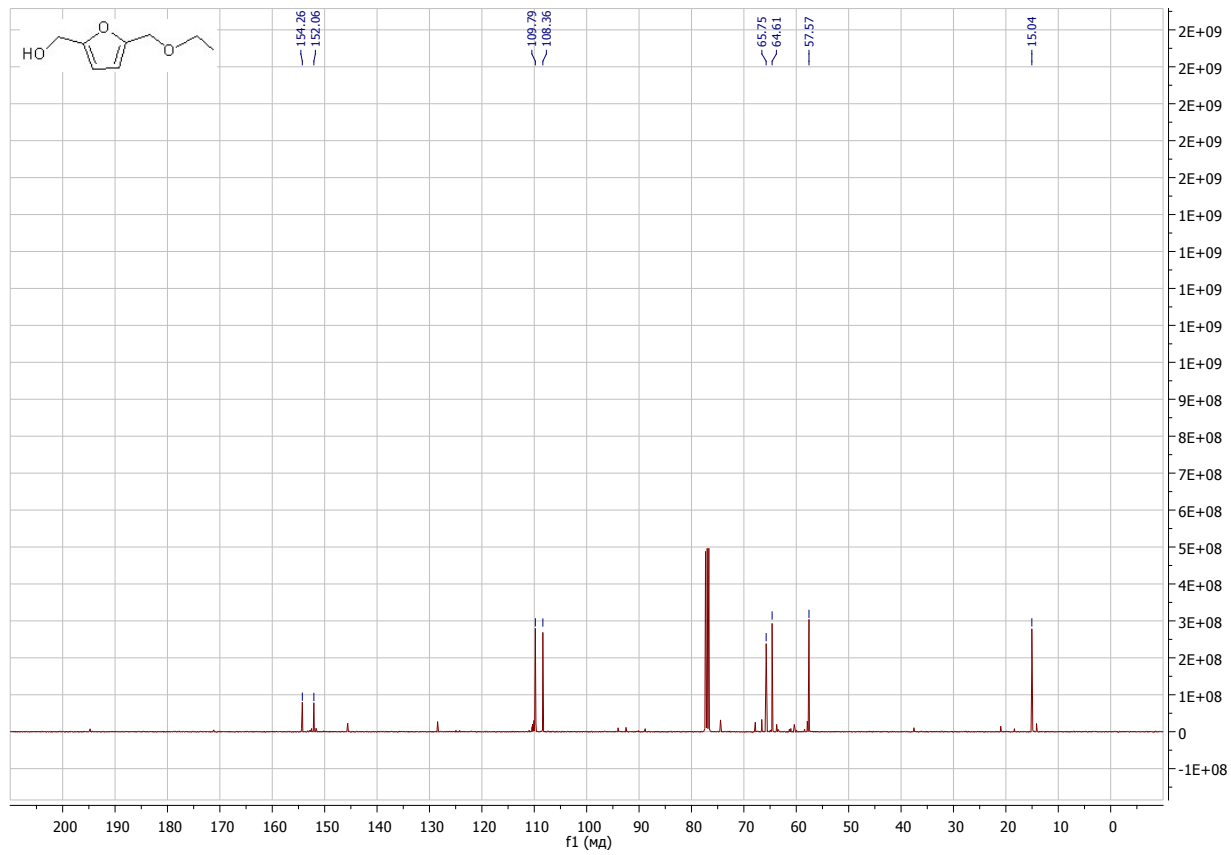

### 2-(ethoxymethyl)-5-((prop-2-yn-1-yloxy)methyl)furan (6)

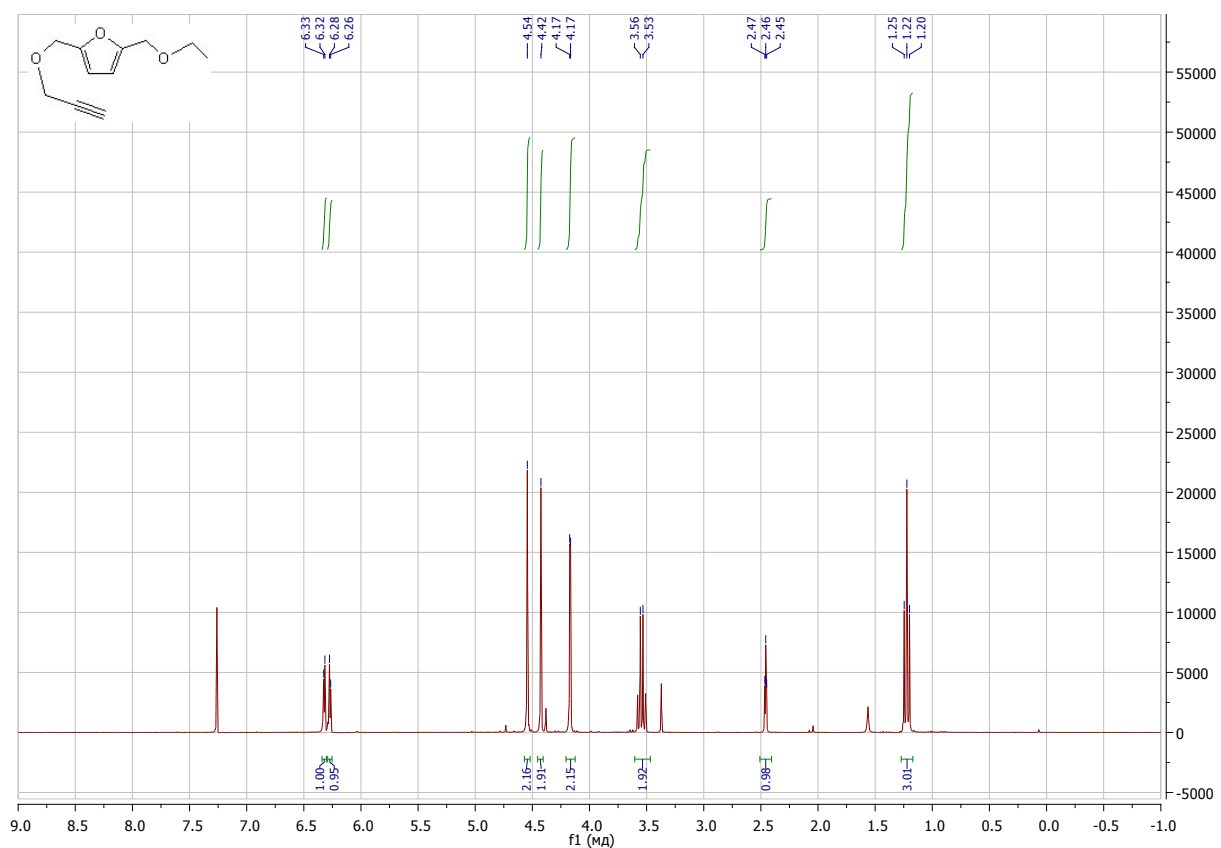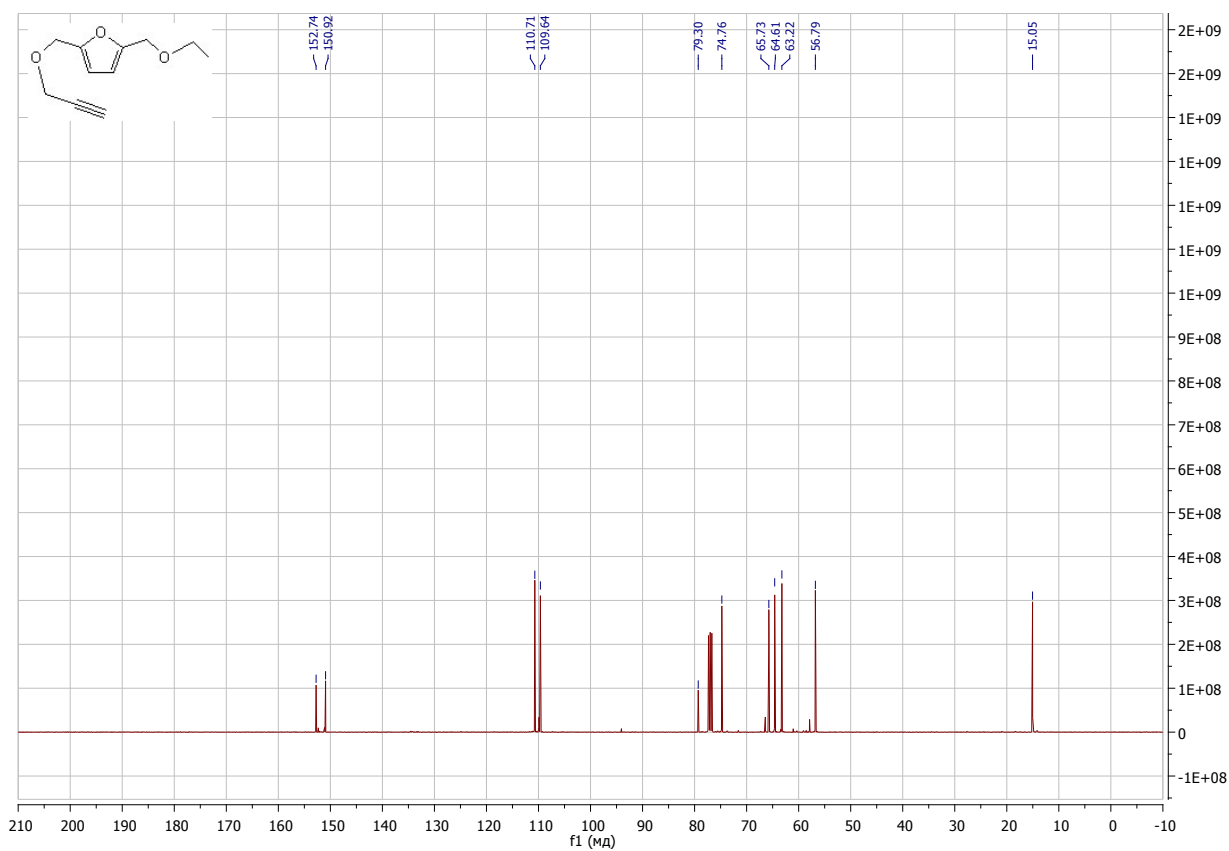

# 6-(ethoxymethyl)-1,3-dihydrofuro[3,4-c]oxepine

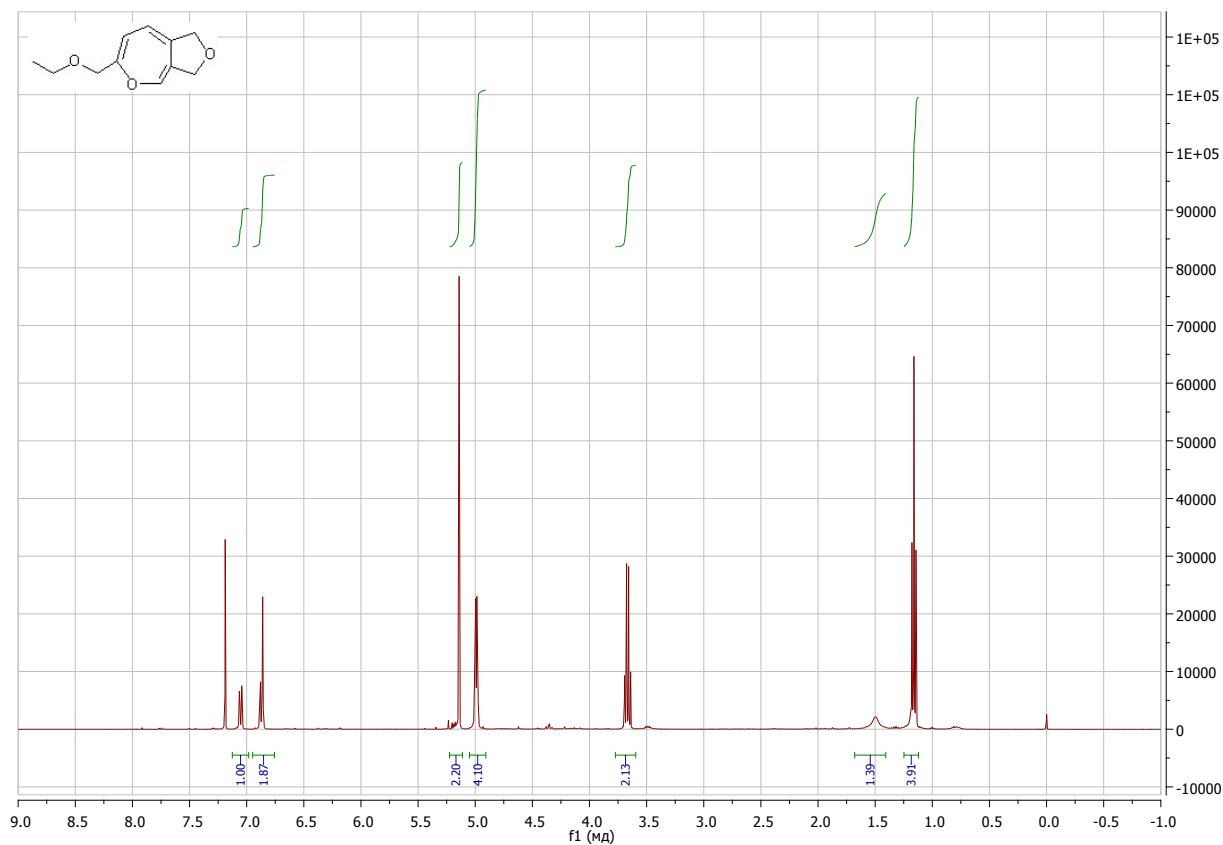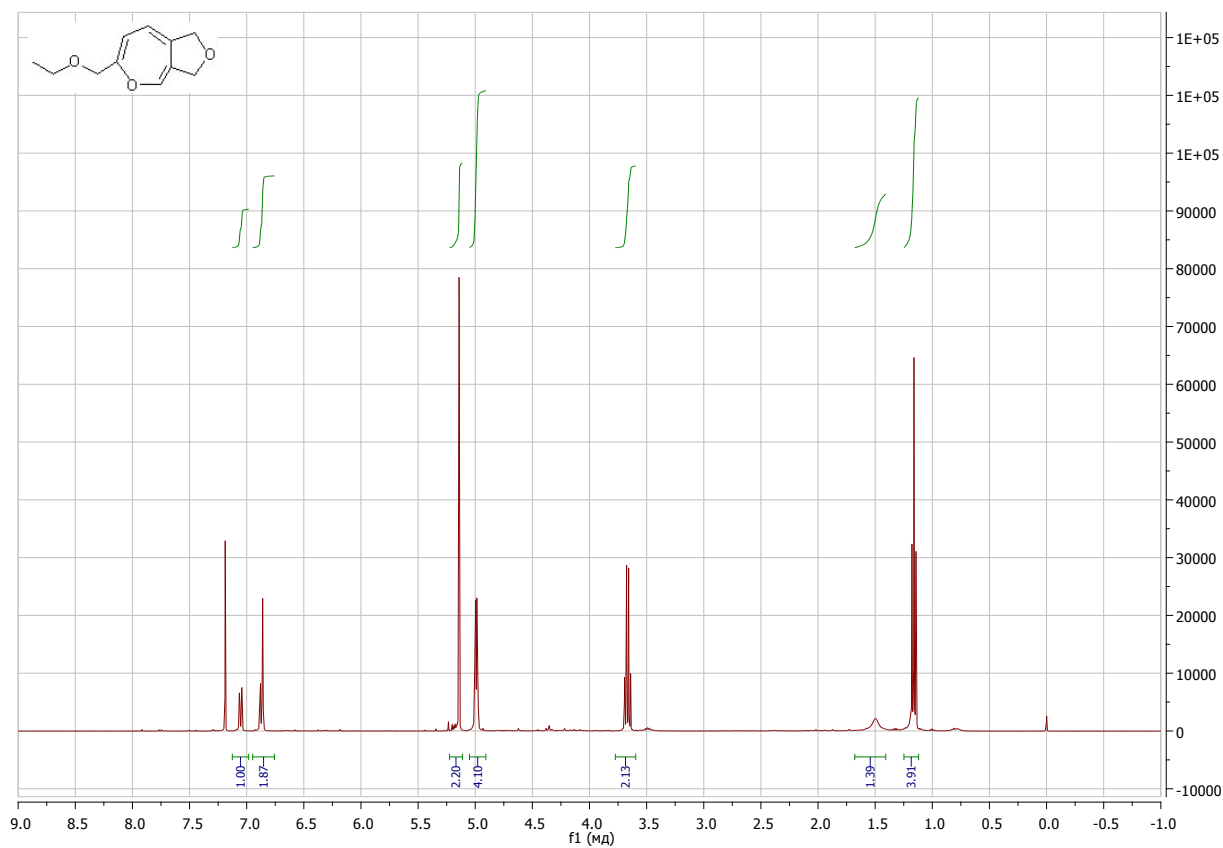

5-(ethoxymethyl)-1,3-dihydroisobenzofuran-4-ol (9)

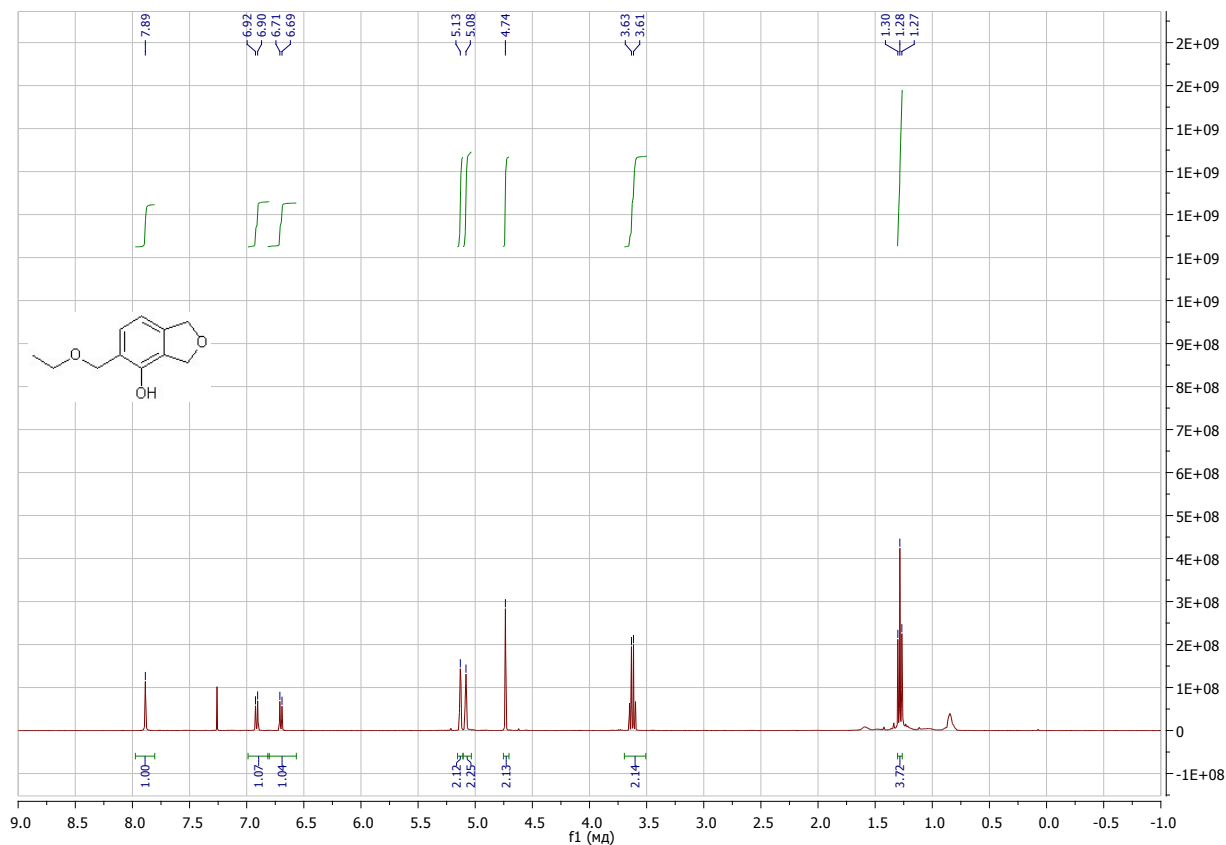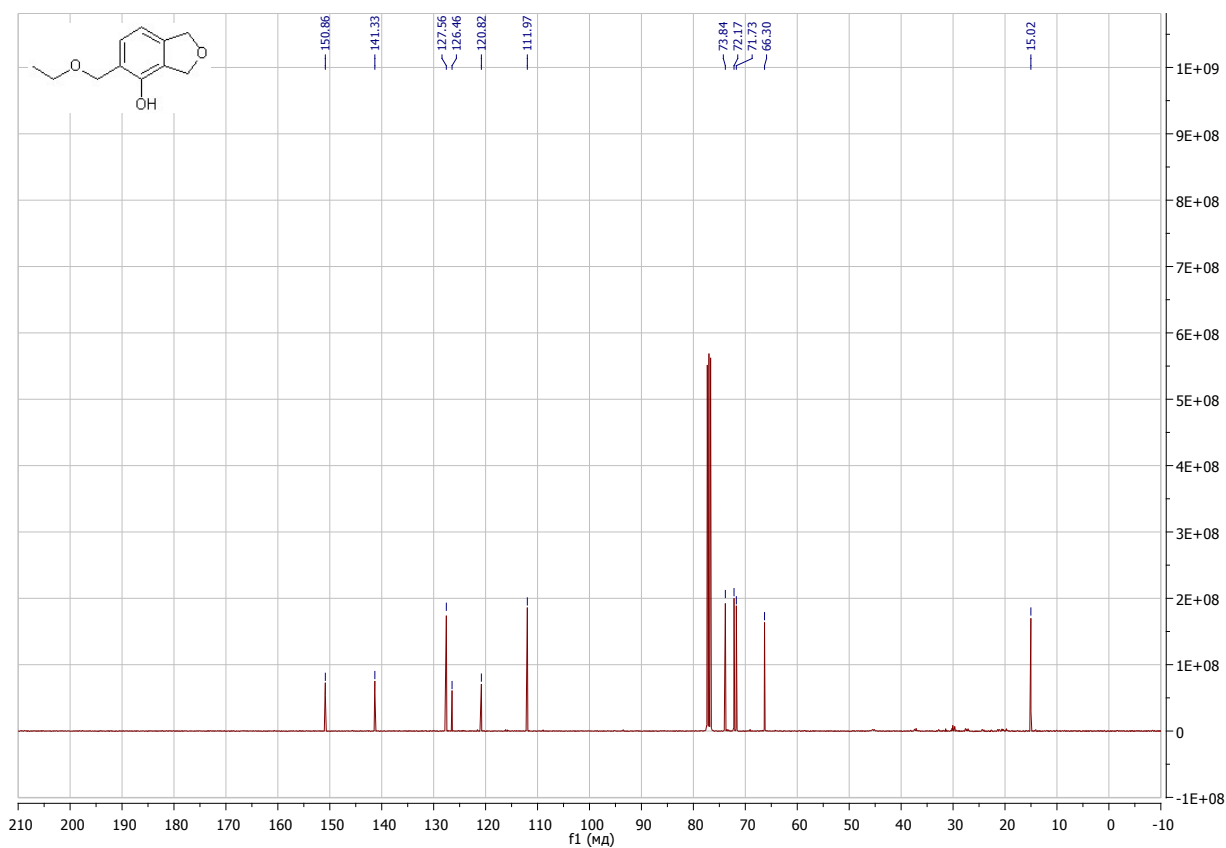



4-(ethoxymethyl)-1,3-dihydroisobenzofuran-5-ol and 6-(ethoxymethyl)-1,3-dihydroisobenzofuran-5-

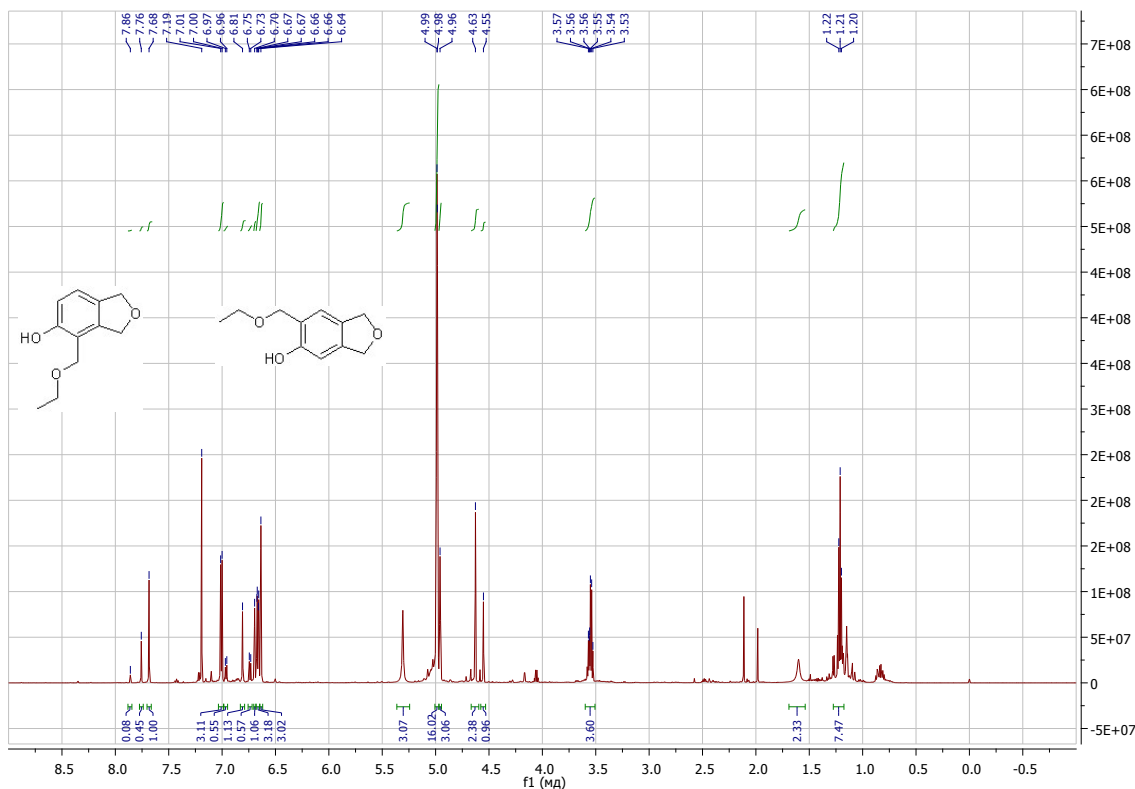

ol.

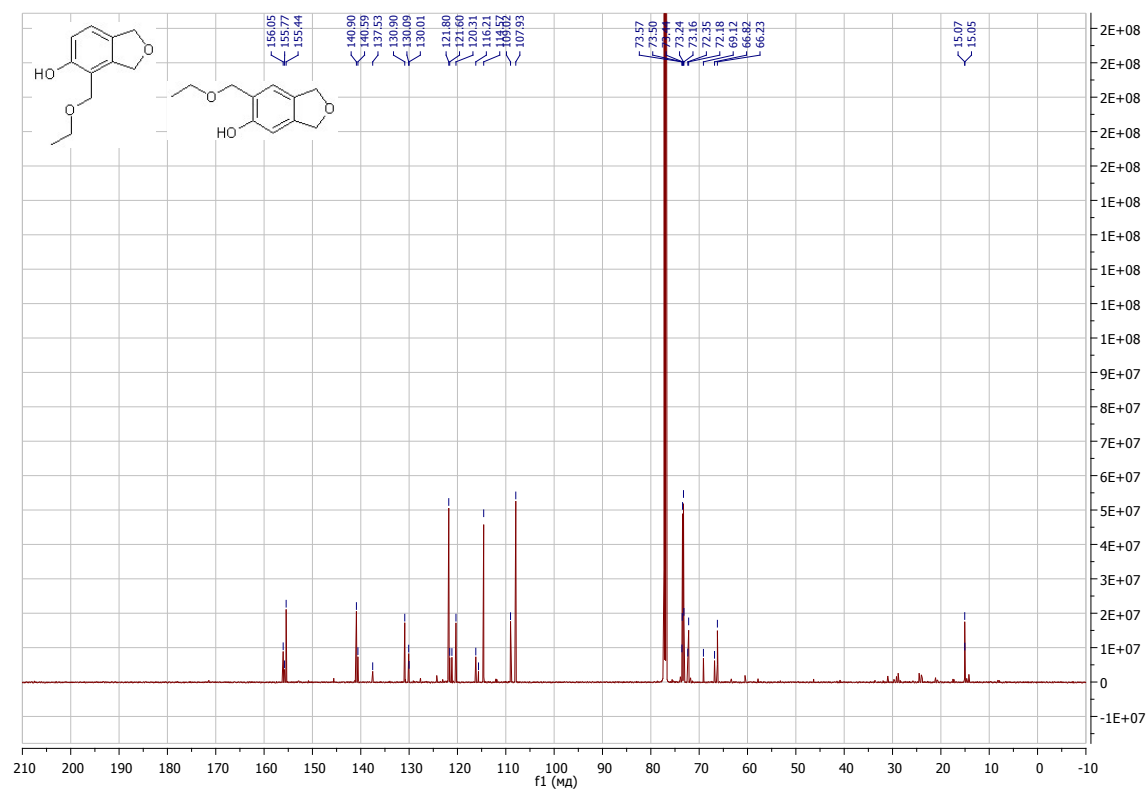

Chemie : Svetlana Tsupova (AK Hashmi)  
 Probe : ST676  
 Dateinamen : sts9.\*  
 Operateur : F. Rominger (AK Hofmann)  
 Gerät : Bruker APEX-II Quazar

Table 4: Kristalldaten und Strukturverfeinerung für sts9

|                                   |                                              |                  |
|-----------------------------------|----------------------------------------------|------------------|
| Strukturkennzeichen               | sts9                                         |                  |
| Summenformel                      | C <sub>8</sub> H <sub>8</sub> O <sub>2</sub> |                  |
| Molmasse                          | 136.14                                       |                  |
| Temperatur                        | 200(2) K                                     |                  |
| Wellenlänge                       | 0.71073 Å                                    |                  |
| Kristallsystem                    | monoklin                                     |                  |
| Raumgruppe                        | P2 <sub>1</sub> /n                           |                  |
| Z                                 | 4                                            |                  |
| Gitterkonstanten                  | a = 6.6884(5) Å                              | α = 90 °         |
|                                   | b = 7.6318(6) Å                              | β = 100.414(2) ° |
|                                   | c = 12.9438(11) Å                            | γ = 90 °         |
| Zellvolumen                       | 649.83(9) Å <sup>3</sup>                     |                  |
| Dichte (berechnet)                | 1.392 g/cm <sup>3</sup>                      |                  |
| Absorptionskoeffizient μ          | 0.100 mm <sup>-1</sup>                       |                  |
| Kristallform                      | polyhedron                                   |                  |
| Kristallgröße                     | 0.110 x 0.090 x 0.090 mm <sup>3</sup>        |                  |
| Kristallfarbe                     | colourless                                   |                  |
| Gemessener Theta-Bereich          | 3.112 bis 27.386 °                           |                  |
| Indexgrenzen                      | -8 ≤ h ≤ 8, 0 ≤ k ≤ 9, 0 ≤ l ≤ 16            |                  |
| Gemessene Reflexe                 | 6490                                         |                  |
| Unabhängige Reflexe               | 1928 (R(int) = 0.0279)                       |                  |
| Beobachtete Reflexe               | 1534 (I > 2σ(I))                             |                  |
| Absorptionskorrektur              | Semi-empirical from equivalents              |                  |
| Max/min Transmission              | 0.96 and 0.89                                |                  |
| Strukturverfeinerung              | Full-matrix least-squares on F <sup>2</sup>  |                  |
| Daten/Restraints/Parameter        | 1928 / 0 / 96                                |                  |
| Goodness-of-fit on F <sup>2</sup> | 1.18                                         |                  |
| R-Werte (I > 2σ(I))               | R1 = 0.042, wR2 = 0.131                      |                  |
| Extinktionskoeffizient            | n/a                                          |                  |
| Max/min Restelektronendichte      | 0.27 und -0.21 eÅ <sup>-3</sup>              |                  |

Table 5: Crystal data and structure refinement for sts9.

|                        |                                              |                     |
|------------------------|----------------------------------------------|---------------------|
| Identification code    | sts9                                         |                     |
| Empirical formula      | C <sub>8</sub> H <sub>8</sub> O <sub>2</sub> |                     |
| Formula weight         | 136.14                                       |                     |
| Temperature            | 200(2) K                                     |                     |
| Wavelength             | 0.71073 Å                                    |                     |
| Crystal system         | monoclinic                                   |                     |
| Space group            | P2 <sub>1</sub> /n                           |                     |
| Z                      | 4                                            |                     |
| Unit cell dimensions   | a = 6.6884(5) Å                              | α = 90 deg.         |
|                        | b = 7.6318(6) Å                              | β = 100.414(2) deg. |
|                        | c = 12.9438(11) Å                            | γ = 90 deg.         |
| Volume                 | 649.83(9) Å <sup>3</sup>                     |                     |
| Density (calculated)   | 1.39 g/cm <sup>3</sup>                       |                     |
| Absorption coefficient | 0.10 mm <sup>-1</sup>                        |                     |
| Crystal shape          | polyhedron                                   |                     |
| Crystal size           | 0.110 x 0.090 x 0.090 mm <sup>3</sup>        |                     |

|                                   |                                             |
|-----------------------------------|---------------------------------------------|
| Crystal colour                    | colourless                                  |
| Theta range for data collection   | 3.1 to 27.4 deg.                            |
| Index ranges                      | -8≤h≤8, 0≤k≤9, 0≤l≤16                       |
| Reflections collected             | 6490                                        |
| Independent reflections           | 1928 (R(int) = 0.0279)                      |
| Observed reflections              | 1534 (I > 2σ(I))                            |
| Absorption correction             | Semi-empirical from equivalents             |
| Max. and min. transmission        | 0.96 and 0.89                               |
| Refinement method                 | Full-matrix least-squares on F <sup>2</sup> |
| Data/restraints/parameters        | 1928 / 0 / 96                               |
| Goodness-of-fit on F <sup>2</sup> | 1.18                                        |
| Final R indices (I>2σ(I))         | R1 = 0.042, wR2 = 0.131                     |
| Largest diff. peak and hole       | 0.27 and -0.21 eÅ <sup>-3</sup>             |

Table 6: Atomkoordinaten und äquivalente isotrope Auslenkungsparameter (Å<sup>2</sup>) für sts9. U<sub>eq</sub> wird berechnet als ein Drittel der Spur des orthogonalen U<sub>ij</sub> Tensors. (Atomic coordinates and equivalent isotropic displacement parameters (Å<sup>2</sup>) for sts9. U<sub>eq</sub> is defined as one third of the trace of the orthogonalized U<sub>ij</sub> tensor.)

| Atom | x         | y         | z         | U <sub>eq</sub> |
|------|-----------|-----------|-----------|-----------------|
| O1   | 0.5410(3) | 0.1069(2) | 0.9001(1) | 0.0355(5)       |
| H1   | 0.450(5)  | 0.158(4)  | 0.925(3)  | 0.059(10)       |
| C1   | 0.5312(3) | 0.1489(3) | 0.7965(2) | 0.0256(5)       |
| C2   | 0.6888(3) | 0.0886(3) | 0.7489(2) | 0.0254(5)       |
| H2   | 0.7953    | 0.0191    | 0.7867    | 0.030           |
| C3   | 0.6861(3) | 0.1330(3) | 0.6446(2) | 0.0230(5)       |
| C4   | 0.5293(4) | 0.2307(3) | 0.5880(2) | 0.0230(6)       |
| C5   | 0.3701(4) | 0.2870(3) | 0.6350(2) | 0.0264(5)       |
| H5   | 0.2607    | 0.3520    | 0.5960    | 0.032           |
| C6   | 0.3729(4) | 0.2468(3) | 0.7397(2) | 0.0271(7)       |
| H6   | 0.2658    | 0.2865    | 0.7731    | 0.033           |
| O7   | 0.7701(3) | 0.1885(2) | 0.4810(1) | 0.0362(5)       |
| C7   | 0.8373(4) | 0.0911(3) | 0.5760(2) | 0.0302(6)       |
| H7A  | 0.9756    | 0.1280    | 0.6098    | 0.036           |
| H7B  | 0.8387    | -0.0361   | 0.5613    | 0.036           |
| C8   | 0.5695(5) | 0.2584(3) | 0.4787(2) | 0.0303(6)       |
| H8A  | 0.4681    | 0.1954    | 0.4267    | 0.036           |
| H8B  | 0.5648    | 0.3846    | 0.4607    | 0.036           |

Table 7: H-Atomkoordinaten und isotrope Auslenkungsparameter (Å<sup>2</sup>) für sts9. (Hydrogen coordinates and isotropic displacement parameters (Å<sup>2</sup>) for sts9.)

| Atom | x        | y        | z        | U <sub>eq</sub> |
|------|----------|----------|----------|-----------------|
| H1   | 0.450(5) | 0.158(4) | 0.925(3) | 0.059(10)       |
| H2   | 0.7953   | 0.0191   | 0.7867   | 0.030           |
| H5   | 0.2607   | 0.3520   | 0.5960   | 0.032           |
| H6   | 0.2658   | 0.2865   | 0.7731   | 0.033           |
| H7A  | 0.9756   | 0.1280   | 0.6098   | 0.036           |
| H7B  | 0.8387   | -0.0361  | 0.5613   | 0.036           |
| H8A  | 0.4681   | 0.1954   | 0.4267   | 0.036           |
| H8B  | 0.5648   | 0.3846   | 0.4607   | 0.036           |

Table 8: Anisotrope Auslenkungsparameter ( $\text{\AA}^2$ ) für sts9. Der Exponent für den anisotropen Auslenkungsparameter hat die Form:  $-2 \pi^2 (h^2 a^{*2} U_{11} + \dots + 2 h k a^* b^* U_{12})$   
 (Anisotropic displacement parameters ( $\text{\AA}^2$ ) for sts9. The anisotropic displacement factor exponent takes the form:  $-2 \pi^2 (h^2 a^{*2} U_{11} + \dots + 2 h k a^* b^* U_{12})$ )

| Atom | $U_{11}$   | $U_{22}$   | $U_{33}$   | $U_{23}$   | $U_{13}$   | $U_{12}$   |
|------|------------|------------|------------|------------|------------|------------|
| O1   | 0.0424(11) | 0.0446(11) | 0.0220(9)  | 0.0014(7)  | 0.0126(8)  | 0.0030(8)  |
| C1   | 0.0307(12) | 0.0272(11) | 0.0200(11) | -0.0035(9) | 0.0076(9)  | -0.0060(9) |
| C2   | 0.0264(11) | 0.0256(11) | 0.0238(11) | 0.0008(9)  | 0.0036(9)  | 0.0013(9)  |
| C3   | 0.0252(11) | 0.0198(10) | 0.0252(11) | -0.0033(8) | 0.0080(8)  | -0.0043(8) |
| C4   | 0.0263(13) | 0.0212(11) | 0.0219(13) | 0.0004(8)  | 0.0052(10) | -0.0038(8) |
| C5   | 0.0252(12) | 0.0254(11) | 0.0293(14) | 0.0012(10) | 0.0064(10) | -0.0011(9) |
| C6   | 0.0236(14) | 0.0295(14) | 0.0313(16) | -0.0036(8) | 0.0131(13) | -0.0002(8) |
| O7   | 0.0411(10) | 0.0432(10) | 0.0289(9)  | 0.0056(8)  | 0.0184(7)  | 0.0027(9)  |
| C7   | 0.0319(12) | 0.0340(12) | 0.0276(13) | 0.0004(9)  | 0.0130(10) | 0.0009(10) |
| C8   | 0.0346(16) | 0.0310(14) | 0.0271(15) | 0.0025(8)  | 0.0107(12) | -0.0015(9) |

Table 9: Bindungslängen ( $\text{\AA}$ ) und -winkel ( $^\circ$ ) für sts9.  
 (Bond lengths ( $\text{\AA}$ ) and angles (deg) for sts9.)

|          |            |            |            |
|----------|------------|------------|------------|
| O1-C1    | 1.369(3)   | C1-C6-H6   | 119.7      |
| O1-H1    | 0.83(4)    | C7-O7-C8   | 110.84(17) |
| C1-C6    | 1.392(3)   | O7-C7-C3   | 104.89(17) |
| C1-C2    | 1.392(3)   | O7-C7-H7A  | 110.8      |
| C2-C3    | 1.388(3)   | C3-C7-H7A  | 110.8      |
| C2-H2    | 0.9500     | O7-C7-H7B  | 110.8      |
| C3-C4    | 1.384(3)   | C3-C7-H7B  | 110.8      |
| C3-C7    | 1.496(3)   | H7A-C7-H7B | 108.8      |
| C4-C5    | 1.386(3)   | O7-C8-C4   | 104.7(2)   |
| C4-C8    | 1.502(4)   | O7-C8-H8A  | 110.8      |
| C5-C6    | 1.387(4)   | C4-C8-H8A  | 110.8      |
| C5-H5    | 0.9500     | O7-C8-H8B  | 110.8      |
| C6-H6    | 0.9500     | C4-C8-H8B  | 110.8      |
| O7-C7    | 1.438(3)   | H8A-C8-H8B | 108.9      |
| O7-C8    | 1.439(3)   |            |            |
| C7-H7A   | 0.9900     |            |            |
| C7-H7B   | 0.9900     |            |            |
| C8-H8A   | 0.9900     |            |            |
| C8-H8B   | 0.9900     |            |            |
| C1-O1-H1 | 111(2)     |            |            |
| O1-C1-C6 | 122.7(2)   |            |            |
| O1-C1-C2 | 116.8(2)   |            |            |
| C6-C1-C2 | 120.5(2)   |            |            |
| C3-C2-C1 | 118.19(19) |            |            |
| C3-C2-H2 | 120.9      |            |            |
| C1-C2-H2 | 120.9      |            |            |
| C4-C3-C2 | 121.4(2)   |            |            |
| C4-C3-C7 | 109.2(2)   |            |            |
| C2-C3-C7 | 129.3(2)   |            |            |
| C3-C4-C5 | 120.2(2)   |            |            |
| C3-C4-C8 | 109.1(2)   |            |            |
| C5-C4-C8 | 130.7(2)   |            |            |
| C4-C5-C6 | 119.0(2)   |            |            |
| C4-C5-H5 | 120.5      |            |            |
| C6-C5-H5 | 120.5      |            |            |
| C5-C6-C1 | 120.6(2)   |            |            |
| C5-C6-H6 | 119.7      |            |            |

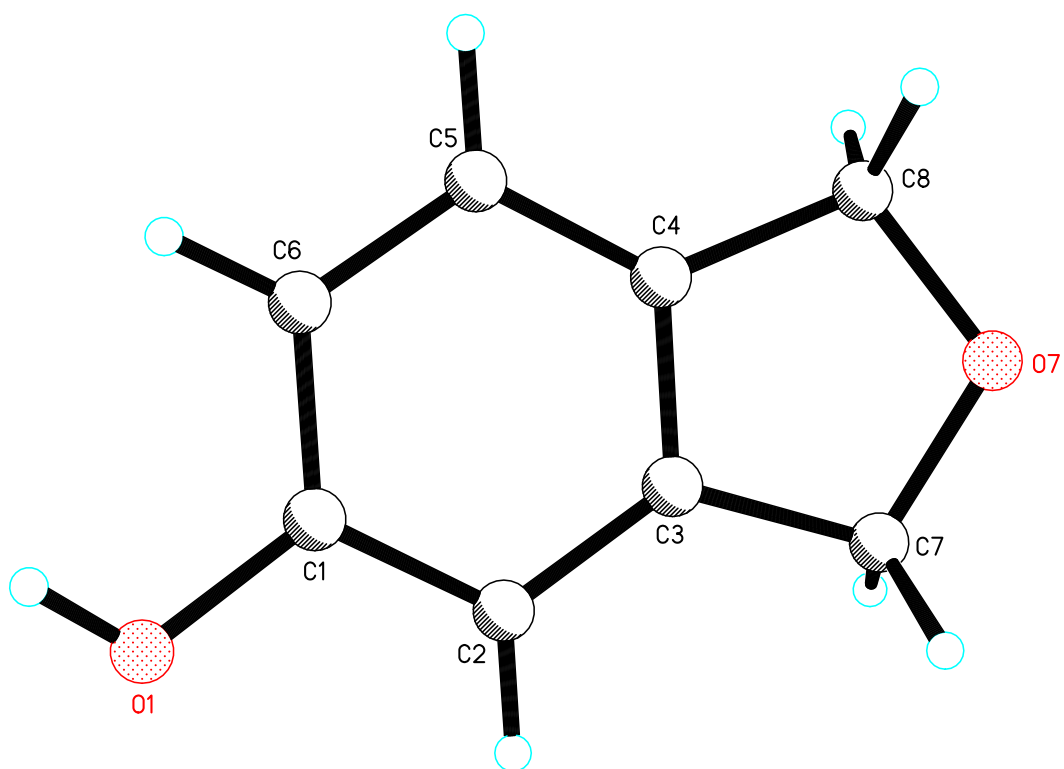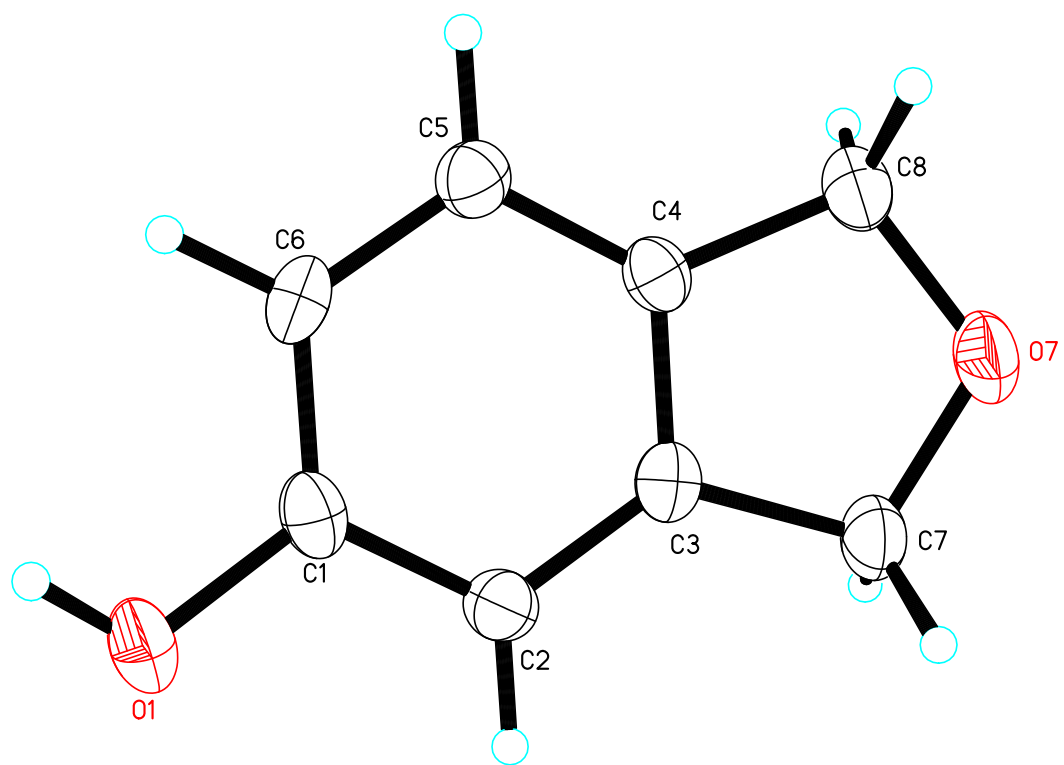

sts9: colourless crystal (polyhedron), dimensions 0.110 x 0.090 x 0.090 mm<sup>3</sup>, crystal system monoclinic, space group P2<sub>1</sub>/n, Z=4, a=6.6884(5) Å, b=7.6318(6) Å, c=12.9438(11) Å, alpha=90 deg, beta=100.414(2) deg, gamma=90 deg, V=649.83(9) Å<sup>3</sup>, rho=1.392 g/cm<sup>3</sup>, T=200(2) K, Theta<sub>max</sub>= 27.386 deg, radiation Mo Kalpha, lambda=0.71073 Å, 0.5 deg omega-scans with CCD area detector, covering the asymmetric unit in reciprocal space with a mean redundancy of 3.37 and a completeness of 93.0% to a resolution of 0.77 Å, 6490 reflections measured, 1928 unique (R(int)=0.0279), 1534 observed (I > 2σ(I)), intensities were corrected for Lorentz and polarization effects, an empirical absorption correction was applied using SADABS<sup>1</sup> based on the Laue symmetry of the reciprocal space, mu=0.10mm<sup>-1</sup>, T<sub>min</sub>=0.89, T<sub>max</sub>=0.96, structure refined against F<sup>2</sup> with a Full-matrix least-squares algorithm using the SHELXL (Version 2014-3) software <sup>2</sup>, 96 parameters refined, hydrogen atoms were treated using appropriate riding models, goodness of fit 1.18 for observed reflections, final residual values R1(F)=0.042, wR(F<sup>2</sup>)=0.131 for observed reflections, residual electron density -0.21 to 0.27 eÅ<sup>-3</sup>. CCDC ..... contains the supplementary crystallographic data for this paper. These data can be obtained free of charge from The Cambridge Crystallographic Data Centre via [www.ccdc.cam.ac.uk/data\\_request/cif](http://www.ccdc.cam.ac.uk/data_request/cif).

Lit. 1: (program SADABS 2012/1 for absorption correction)  
G. M. Sheldrick, Bruker Analytical X-ray-Division, Madison, Wisconsin 2012

Lit. 2: (program SHELXL 2014-3 for structure refinement)  
Sheldrick, G.M. (2008). Acta Cryst. A64, 112-122.

Lit. APEX, APEX2, SMART, SAINT, SAINT-Plus:  
Bruker (2007). "Program name(s)". Bruker AXS Inc., Madison, Wisconsin, USA.

Chemie : Svetlana Tsupova (AK Hashmi)  
 Probe : ST387  
 Dateinamen : sts24.\*  
 Operateur : F. Rominger (AK Hofmann)  
 Gerät : Bruker APEX-II CCD

Table 10: Kristalldaten und Strukturverfeinerung für sts24

|                                   |                                                |                 |
|-----------------------------------|------------------------------------------------|-----------------|
| Strukturkennzeichen               | sts24                                          |                 |
| Summenformel                      | C <sub>11</sub> H <sub>14</sub> O <sub>3</sub> |                 |
| Molmasse                          | 194.22                                         |                 |
| Temperatur                        | 200(2) K                                       |                 |
| Wellenlänge                       | 0.71073 Å                                      |                 |
| Kristallsystem                    | monoklin                                       |                 |
| Raumgruppe                        | P2 <sub>1</sub> /c                             |                 |
| Z                                 | 4                                              |                 |
| Gitterkonstanten                  | a = 4.5985(6) Å                                | α = 90 °        |
|                                   | b = 20.751(3) Å                                | β = 91.893(3) ° |
|                                   | c = 10.2612(13) Å                              | γ = 90 °        |
| Zellvolumen                       | 978.6(2) Å <sup>3</sup>                        |                 |
| Dichte (berechnet)                | 1.318 g/cm <sup>3</sup>                        |                 |
| Absorptionskoeffizient μ          | 0.095 mm <sup>-1</sup>                         |                 |
| Kristallform                      | keil                                           |                 |
| Kristallgröße                     | 0.41 x 0.09 x 0.04 mm <sup>3</sup>             |                 |
| Kristallfarbe                     | colourless                                     |                 |
| Gemessener Theta-Bereich          | 1.963 bis 25.179 °                             |                 |
| Indexgrenzen                      | -5 ≤ h ≤ 5, -24 ≤ k ≤ 24, -11 ≤ l ≤ 12         |                 |
| Gemessene Reflexe                 | 6096                                           |                 |
| Unabhängige Reflexe               | 1759 (R(int) = 0.0275)                         |                 |
| Beobachtete Reflexe               | 1484 (I > 2σ(I))                               |                 |
| Absorptionskorrektur              | Semi-empirical from equivalents                |                 |
| Max/min Transmission              | 0.96 and 0.79                                  |                 |
| Strukturverfeinerung              | Full-matrix least-squares on F <sup>2</sup>    |                 |
| Daten/Restraints/Parameter        | 1759 / 0 / 129                                 |                 |
| Goodness-of-fit on F <sup>2</sup> | 1.21                                           |                 |
| R-Werte (I > 2σ(I))               | R1 = 0.042, wR2 = 0.126                        |                 |
| Extinktionskoeffizient            | n/a                                            |                 |
| Max/min Restelektronendichte      | 0.19 und -0.22 eÅ <sup>-3</sup>                |                 |

Table 11: Crystal data and structure refinement for sts24.

|                        |                                                |                    |
|------------------------|------------------------------------------------|--------------------|
| Identification code    | sts24                                          |                    |
| Empirical formula      | C <sub>11</sub> H <sub>14</sub> O <sub>3</sub> |                    |
| Formula weight         | 194.22                                         |                    |
| Temperature            | 200(2) K                                       |                    |
| Wavelength             | 0.71073 Å                                      |                    |
| Crystal system         | monoclinic                                     |                    |
| Space group            | P2 <sub>1</sub> /c                             |                    |
| Z                      | 4                                              |                    |
| Unit cell dimensions   | a = 4.5985(6) Å                                | α = 90 deg.        |
|                        | b = 20.751(3) Å                                | β = 91.893(3) deg. |
|                        | c = 10.2612(13) Å                              | γ = 90 deg.        |
| Volume                 | 978.6(2) Å <sup>3</sup>                        |                    |
| Density (calculated)   | 1.32 g/cm <sup>3</sup>                         |                    |
| Absorption coefficient | 0.09 mm <sup>-1</sup>                          |                    |
| Crystal shape          | wedge                                          |                    |
| Crystal size           | 0.410 x 0.090 x 0.040 mm <sup>3</sup>          |                    |
| Crystal colour         | colourless                                     |                    |

|                                   |                                             |
|-----------------------------------|---------------------------------------------|
| Theta range for data collection   | 2.0 to 25.2 deg.                            |
| Index ranges                      | -5≤h≤5, -24≤k≤24, -11≤l≤12                  |
| Reflections collected             | 6096                                        |
| Independent reflections           | 1759 (R(int) = 0.0275)                      |
| Observed reflections              | 1484 (I > 2σ(I))                            |
| Absorption correction             | Semi-empirical from equivalents             |
| Max. and min. transmission        | 0.96 and 0.79                               |
| Refinement method                 | Full-matrix least-squares on F <sup>2</sup> |
| Data/restraints/parameters        | 1759 / 0 / 129                              |
| Goodness-of-fit on F <sup>2</sup> | 1.21                                        |
| Final R indices (I>2σ(I))         | R1 = 0.042, wR2 = 0.126                     |
| Largest diff. peak and hole       | 0.19 and -0.22 eÅ <sup>-3</sup>             |

Table 12: Atomkoordinaten und äquivalente isotrope Auslenkungsparameter (Å<sup>2</sup>) für sts24. U<sub>eq</sub> wird berechnet als ein Drittel der Spur des orthogonalen U<sub>ij</sub> Tensors.  
(Atomic coordinates and equivalent isotropic displacement parameters (Å<sup>2</sup>) for sts24. U<sub>eq</sub> is defined as one third of the trace of the orthogonalized U<sub>ij</sub> tensor.)

| Atom | x         | y         | z          | U <sub>eq</sub> |
|------|-----------|-----------|------------|-----------------|
| C11  | 0.3818(4) | 0.6850(1) | -0.0352(2) | 0.0238(4)       |
| O11  | 0.2995(3) | 0.7374(1) | 0.0349(1)  | 0.0321(4)       |
| H11  | 0.1780    | 0.7260    | 0.0898     | 0.048           |
| C12  | 0.5736(4) | 0.6966(1) | -0.1353(2) | 0.0229(4)       |
| C13  | 0.6685(4) | 0.6471(1) | -0.2125(2) | 0.0273(5)       |
| C14  | 0.5760(5) | 0.5842(1) | -0.1940(2) | 0.0352(5)       |
| H14  | 0.6404    | 0.5500    | -0.2476    | 0.042           |
| C15  | 0.3865(5) | 0.5731(1) | -0.0947(2) | 0.0358(5)       |
| H15  | 0.3218    | 0.5302    | -0.0803    | 0.043           |
| C16  | 0.2862(4) | 0.6220(1) | -0.0145(2) | 0.0297(5)       |
| C17  | 0.7053(4) | 0.7590(1) | -0.1769(2) | 0.0265(5)       |
| H17A | 0.5529    | 0.7892    | -0.2094    | 0.032           |
| H17B | 0.8154    | 0.7794    | -0.1034    | 0.032           |
| O17  | 0.8963(3) | 0.7415(1) | -0.2794(2) | 0.0368(4)       |
| C18  | 0.8696(5) | 0.6742(1) | -0.3101(2) | 0.0332(5)       |
| H18A | 1.0618    | 0.6527    | -0.3031    | 0.040           |
| H18B | 0.7881    | 0.6683    | -0.3998    | 0.040           |
| C19  | 0.0830(5) | 0.6059(1) | 0.0924(2)  | 0.0393(6)       |
| H19A | -0.0675   | 0.6398    | 0.0982     | 0.047           |
| H19B | -0.0156   | 0.5644    | 0.0732     | 0.047           |
| O20  | 0.2441(3) | 0.6015(1) | 0.2125(1)  | 0.0342(4)       |
| C21  | 0.0672(5) | 0.5798(1) | 0.3150(2)  | 0.0350(5)       |
| H21A | -0.0074   | 0.5360    | 0.2952     | 0.042           |
| H21B | -0.1011   | 0.6090    | 0.3239     | 0.042           |
| C22  | 0.2480(6) | 0.5789(1) | 0.4396(2)  | 0.0515(7)       |
| H22A | 0.1312    | 0.5623    | 0.5103     | 0.077           |
| H22B | 0.3130    | 0.6228    | 0.4608     | 0.077           |
| H22C | 0.4178    | 0.5511    | 0.4290     | 0.077           |

Table 13: H-Atomkoordinaten und isotrope Auslenkungsparameter (Å<sup>2</sup>) für sts24.  
(Hydrogen coordinates and isotropic displacement parameters (Å<sup>2</sup>) for sts24.)

| Atom | x      | y      | z      | U <sub>eq</sub> |
|------|--------|--------|--------|-----------------|
| H11  | 0.1780 | 0.7260 | 0.0898 | 0.048           |



|      |         |        |         |       |
|------|---------|--------|---------|-------|
| H14  | 0.6404  | 0.5500 | -0.2476 | 0.042 |
| H15  | 0.3218  | 0.5302 | -0.0803 | 0.043 |
| H17A | 0.5529  | 0.7892 | -0.2094 | 0.032 |
| H17B | 0.8154  | 0.7794 | -0.1034 | 0.032 |
| H18A | 1.0618  | 0.6527 | -0.3031 | 0.040 |
| H18B | 0.7881  | 0.6683 | -0.3998 | 0.040 |
| H19A | -0.0675 | 0.6398 | 0.0982  | 0.047 |
| H19B | -0.0156 | 0.5644 | 0.0732  | 0.047 |
| H21A | -0.0074 | 0.5360 | 0.2952  | 0.042 |
| H21B | -0.1011 | 0.6090 | 0.3239  | 0.042 |
| H22A | 0.1312  | 0.5623 | 0.5103  | 0.077 |
| H22B | 0.3130  | 0.6228 | 0.4608  | 0.077 |
| H22C | 0.4178  | 0.5511 | 0.4290  | 0.077 |

Table 14: Anisotrope Auslenkungsparameter ( $\text{\AA}^2$ ) für sts24. Der Exponent für den anisotropen Auslenkungsparameter hat die Form:  $-2 \pi^2 (h^2 a^{*2} U_{11} + \dots + 2 h k a^* b^* U_{12})$   
(Anisotropic displacement parameters ( $\text{\AA}^2$ ) for sts24. The anisotropic displacement factor exponent takes the form:  $-2 \pi^2 (h^2 a^{*2} U_{11} + \dots + 2 h k a^* b^* U_{12})$ )

| Atom | $U_{11}$   | $U_{22}$   | $U_{33}$   | $U_{23}$   | $U_{13}$    | $U_{12}$    |
|------|------------|------------|------------|------------|-------------|-------------|
| C11  | 0.0188(9)  | 0.0330(11) | 0.0196(9)  | 0.0025(8)  | -0.0009(7)  | 0.0017(8)   |
| O11  | 0.0290(8)  | 0.0431(9)  | 0.0248(8)  | -0.0010(6) | 0.0106(6)   | 0.0001(6)   |
| C12  | 0.0186(9)  | 0.0297(11) | 0.0202(9)  | 0.0031(8)  | -0.0009(7)  | 0.0014(7)   |
| C13  | 0.0217(10) | 0.0371(12) | 0.0229(10) | -0.0010(8) | -0.0027(8)  | 0.0068(8)   |
| C14  | 0.0365(12) | 0.0310(12) | 0.0377(12) | -0.0050(9) | -0.0061(10) | 0.0056(9)   |
| C15  | 0.0351(12) | 0.0294(12) | 0.0422(13) | 0.0087(9)  | -0.0104(10) | -0.0061(9)  |
| C16  | 0.0211(10) | 0.0398(12) | 0.0275(11) | 0.0100(9)  | -0.0066(8)  | -0.0059(8)  |
| C17  | 0.0255(10) | 0.0334(11) | 0.0209(10) | 0.0012(8)  | 0.0055(8)   | 0.0003(8)   |
| O17  | 0.0349(8)  | 0.0426(9)  | 0.0341(8)  | 0.0030(7)  | 0.0193(6)   | -0.0010(7)  |
| C18  | 0.0294(11) | 0.0477(14) | 0.0227(10) | -0.0027(9) | 0.0038(8)   | 0.0064(9)   |
| C19  | 0.0263(11) | 0.0546(15) | 0.0366(12) | 0.0171(11) | -0.0036(9)  | -0.0119(10) |
| O20  | 0.0273(8)  | 0.0479(9)  | 0.0274(8)  | 0.0092(6)  | 0.0028(6)   | -0.0049(6)  |
| C21  | 0.0369(12) | 0.0311(12) | 0.0378(12) | 0.0069(9)  | 0.0146(9)   | 0.0021(9)   |
| C22  | 0.0676(17) | 0.0572(16) | 0.0305(13) | 0.0022(11) | 0.0128(12)  | -0.0034(13) |

Table 15: Bindungslängen ( $\text{\AA}$ ) und -winkel ( $^\circ$ ) für sts24.  
(Bond lengths ( $\text{\AA}$ ) and angles (deg) for sts24.)

|          |          |             |            |
|----------|----------|-------------|------------|
| C11-O11  | 1.363(2) | C18-H18B    | 0.9900     |
| C11-C12  | 1.397(3) | C19-O20     | 1.420(3)   |
| C11-C16  | 1.399(3) | C19-H19A    | 0.9900     |
| O11-H11  | 0.8400   | C19-H19B    | 0.9900     |
| C12-C13  | 1.377(3) | O20-C21     | 1.424(2)   |
| C12-C17  | 1.498(3) | C21-C22     | 1.502(3)   |
| C13-C14  | 1.388(3) | C21-H21A    | 0.9900     |
| C13-C18  | 1.496(3) | C21-H21B    | 0.9900     |
| C14-C15  | 1.382(3) | C22-H22A    | 0.9800     |
| C14-H14  | 0.9500   | C22-H22B    | 0.9800     |
| C15-C16  | 1.394(3) | C22-H22C    | 0.9800     |
| C15-H15  | 0.9500   | O11-C11-C12 | 116.39(17) |
| C16-C19  | 1.502(3) | O11-C11-C16 | 124.84(17) |
| C17-O17  | 1.440(2) | C12-C11-C16 | 118.76(18) |
| C17-H17A | 0.9900   | C11-O11-H11 | 109.5      |
| C17-H17B | 0.9900   | C13-C12-C11 | 120.99(18) |
| O17-C18  | 1.436(3) | C13-C12-C17 | 110.06(17) |
| C18-H18A | 0.9900   | C11-C12-C17 | 128.95(17) |

|               |            |
|---------------|------------|
| C12-C13-C14   | 121.26(19) |
| C12-C13-C18   | 108.58(18) |
| C14-C13-C18   | 130.16(19) |
| C15-C14-C13   | 117.4(2)   |
| C15-C14-H14   | 121.3      |
| C13-C14-H14   | 121.3      |
| C14-C15-C16   | 122.9(2)   |
| C14-C15-H15   | 118.6      |
| C16-C15-H15   | 118.6      |
| C15-C16-C11   | 118.69(19) |
| C15-C16-C19   | 119.7(2)   |
| C11-C16-C19   | 121.6(2)   |
| O17-C17-C12   | 104.61(15) |
| O17-C17-H17A  | 110.8      |
| C12-C17-H17A  | 110.8      |
| O17-C17-H17B  | 110.8      |
| C12-C17-H17B  | 110.8      |
| H17A-C17-H17B | 108.9      |
| C18-O17-C17   | 110.84(15) |
| O17-C18-C13   | 105.64(16) |
| O17-C18-H18A  | 110.6      |
| C13-C18-H18A  | 110.6      |
| O17-C18-H18B  | 110.6      |
| C13-C18-H18B  | 110.6      |
| H18A-C18-H18B | 108.7      |
| O20-C19-C16   | 109.20(16) |
| O20-C19-H19A  | 109.8      |
| C16-C19-H19A  | 109.8      |
| O20-C19-H19B  | 109.8      |
| C16-C19-H19B  | 109.8      |
| H19A-C19-H19B | 108.3      |
| C19-O20-C21   | 111.54(16) |
| O20-C21-C22   | 108.61(18) |
| O20-C21-H21A  | 110.0      |
| C22-C21-H21A  | 110.0      |
| O20-C21-H21B  | 110.0      |
| C22-C21-H21B  | 110.0      |
| H21A-C21-H21B | 108.3      |
| C21-C22-H22A  | 109.5      |
| C21-C22-H22B  | 109.5      |
| H22A-C22-H22B | 109.5      |
| C21-C22-H22C  | 109.5      |
| H22A-C22-H22C | 109.5      |
| H22B-C22-H22C | 109.5      |

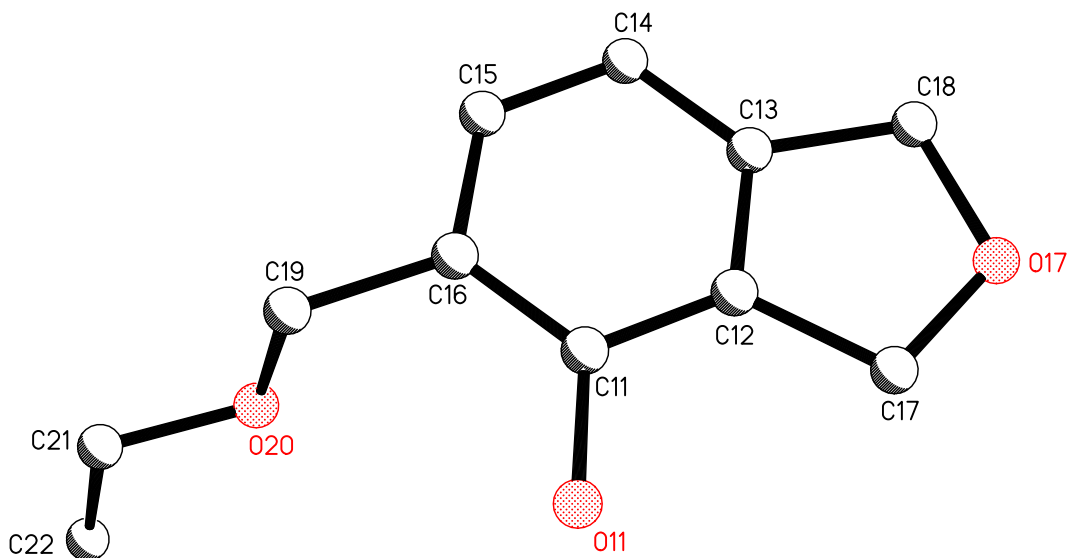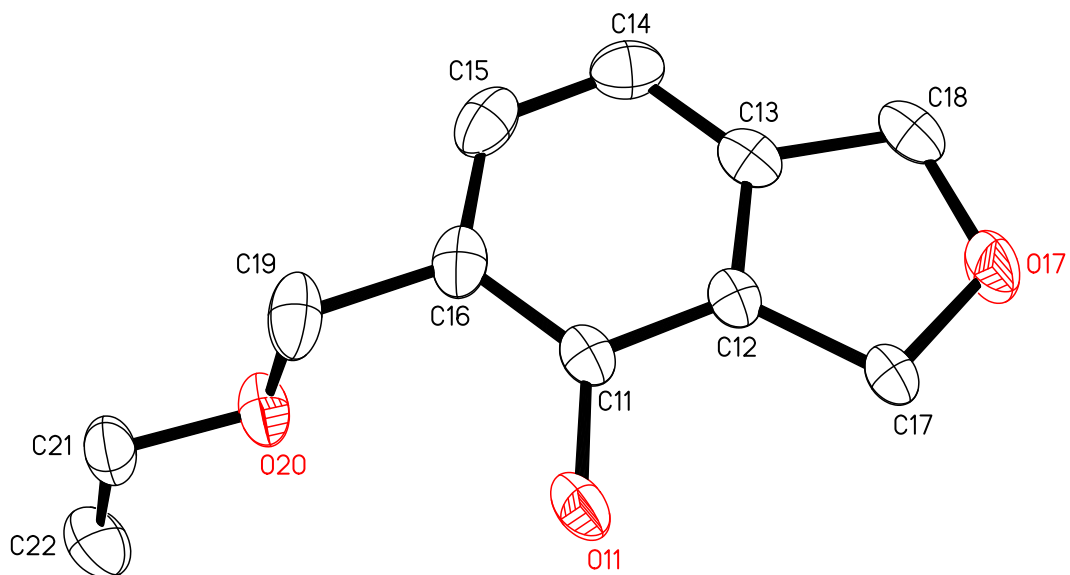

sts24: colourless crystal (keil), dimensions 0.410 x 0.090 x 0.040 mm<sup>3</sup>, crystal system monoclinic, space group P2<sub>1</sub>/c, Z=4, a=4.5985(6) Å, b=20.751(3) Å, c=10.2612(13) Å, alpha=90 deg, beta=91.893(3) deg, gamma=90 deg, V=978.6(2) Å<sup>3</sup>, rho=1.318 g/cm<sup>3</sup>, T=200(2) K, Theta<sub>max</sub>= 25.179 deg, radiation Mo Kalpha, lambda=0.71073 Å, 0.5 deg omega-scans with CCD area detector, covering the asymmetric unit in reciprocal space with a mean redundancy of 3.39 and a completeness of 99.4% to a resolution of 0.84 Å, 6096 reflections measured, 1759 unique (R(int)=0.0275), 1484 observed (I > 2σ(I)), intensities were corrected for

Lorentz and polarization effects, an empirical absorption correction was applied using SADABS<sup>1</sup> based on the Laue symmetry of the reciprocal space,  $\mu=0.09\text{mm}^{-1}$ ,  $T_{\text{min}}=0.79$ ,  $T_{\text{max}}=0.96$ , structure refined against  $F^2$  with a Full-matrix least-squares algorithm using the SHELXL-2014/7 (Sheldrick, 2014) software<sup>2</sup>, 129 parameters refined, hydrogen atoms were treated using appropriate riding models, goodness of fit 1.21 for observed reflections, final residual values  $R1(F)=0.042$ ,  $wR(F^2)=0.126$  for observed reflections, residual electron density  $-0.22$  to  $0.19\text{ e}\text{\AA}^{-3}$ . CCDC ..... contains the supplementary crystallographic data for this paper. These data can be obtained free of charge from The Cambridge Crystallographic Data Centre via [www.ccdc.cam.ac.uk/data\\_request/cif](http://www.ccdc.cam.ac.uk/data_request/cif).

Lit. 1: (program SADABS 2012/1 for absorption correction)  
G. M. Sheldrick, Bruker Analytical X-ray-Division, Madison, Wisconsin 2012

Lit. 2: (program SHELXL-2014/7 (Sheldrick, 2014) for structure refinement)  
Sheldrick, G.M. (2008). *Acta Cryst. A*64, 112-122.

Lit. APEX, APEX2, SMART, SAINT, SAINT-Plus:  
Bruker (2007). "Program name(s)". Bruker AXS Inc., Madison, Wisconsin, USA.

---

<sup>i</sup> B. Martín-Matute, D. J. Cárdenas, A. M. Echavarren, *Angew. Chem. Int. Ed.* **2001**, *40*, 4754 – 4756.
